# Supplementary material for: Second wave of COVID-19 in India could be predicted with genomic surveillance of SARS-CoV-2 variants coupled with epidemiological data: A tool for future
Source: bioRxiv or medRxiv preprint supplement (doi:10.1101/2021.06.09.21258612), 2022-01-06
Supplement: Supplementary file [file media-1.pdf]

## Second wave of COVID-19 in India could be predicted with genomic surveillance of SARS-CoV-2 variants coupled with epidemiological data: A tool for future

Kumar et al., 2021

Supplementary files:

Contents: Figure S1 and S2

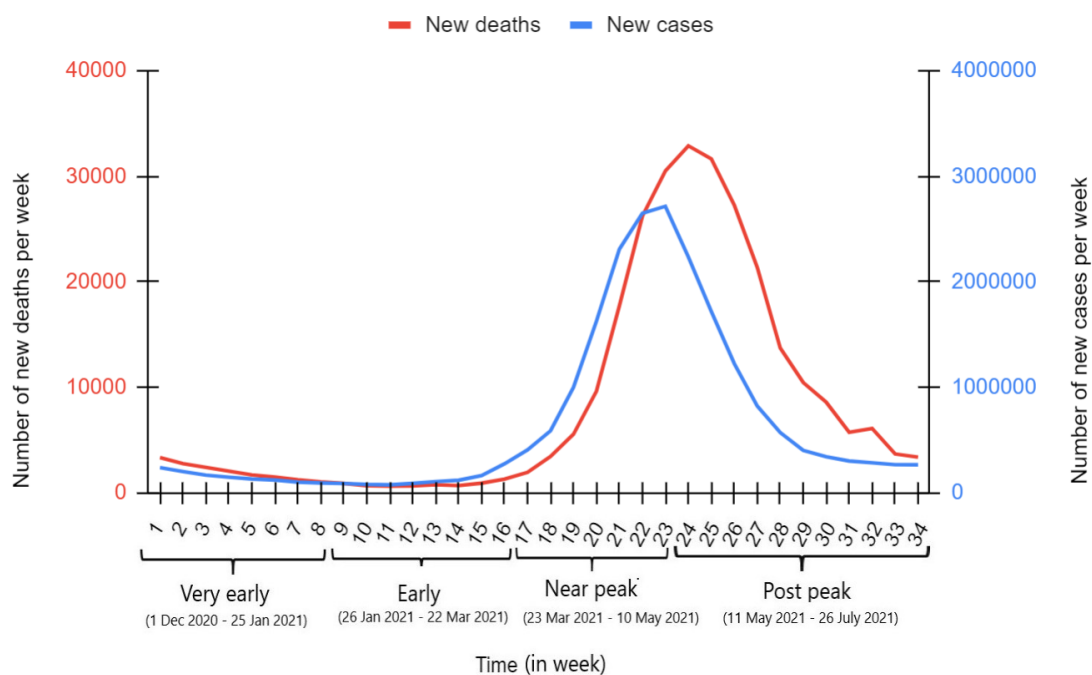

**Figure S1 Weekly new COVID-19 cases and deaths in Indian population for the period of 1st December 2020 to 26th July 2021.** The data were analyzed for the period before the peak of the second wave (23rd week) and thereafter. For the purpose of description, based on the epidemiological trends, the pre peak period was further divided into three time series intervals: 'very early' (1-8 weeks), 'early' (9-16 weeks), and 'near peak' (17-23 weeks).

(Data source: Worldometer:

<https://www.worldometers.info/coronavirus/coronavirus/country/india>).

A

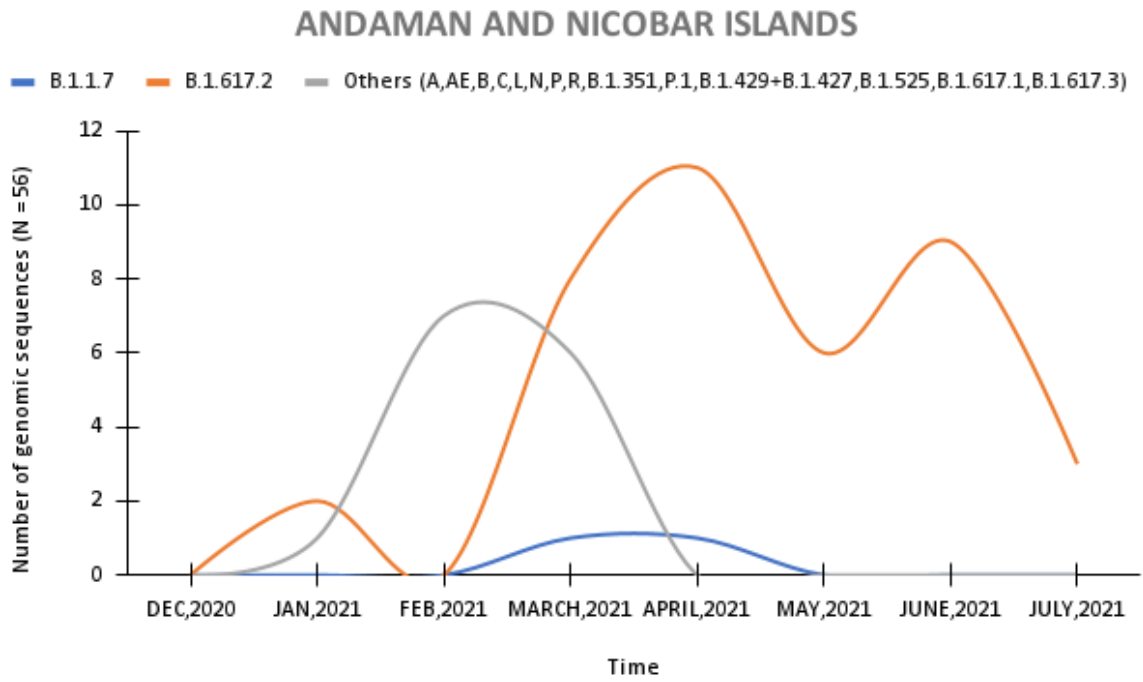

B

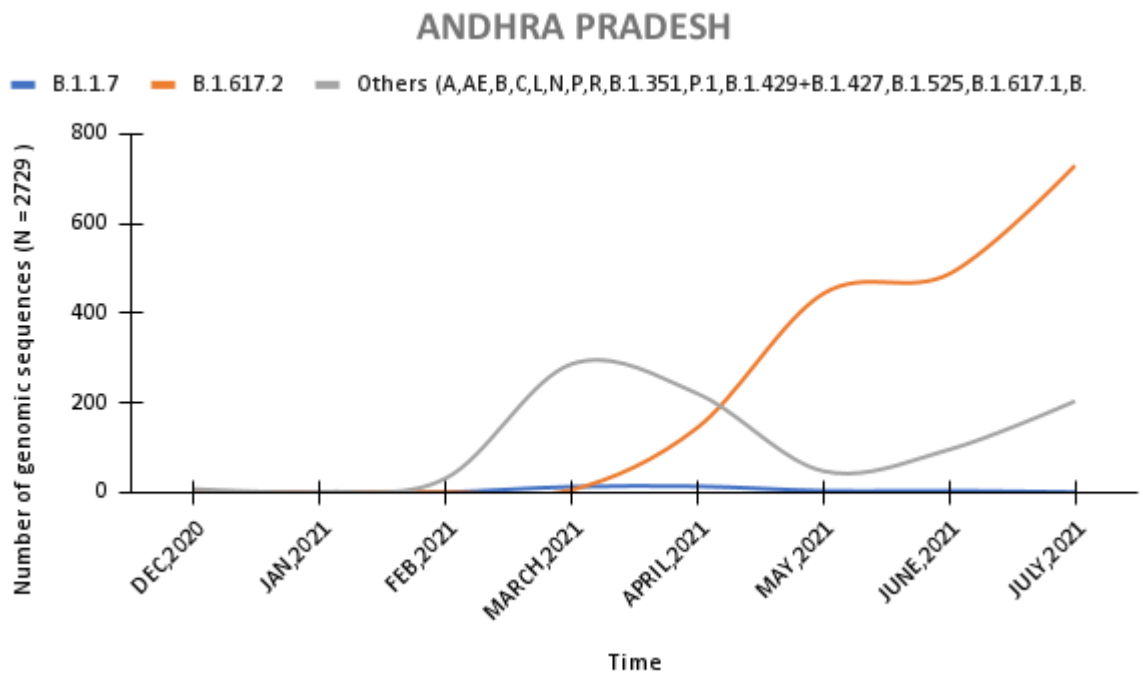

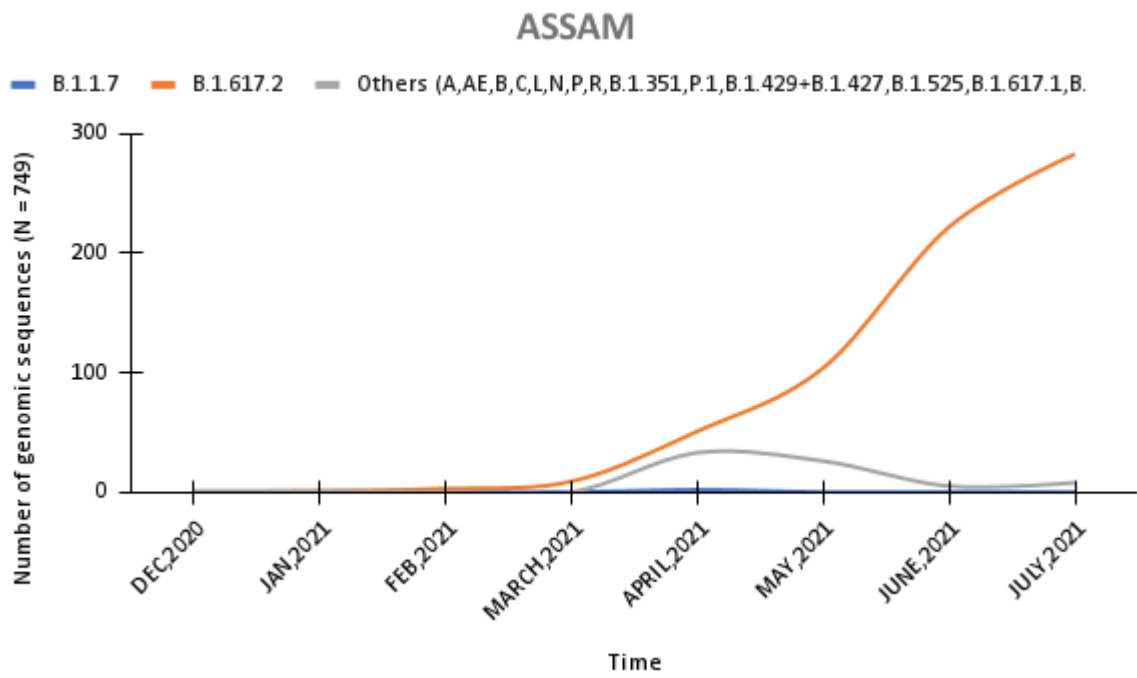

C

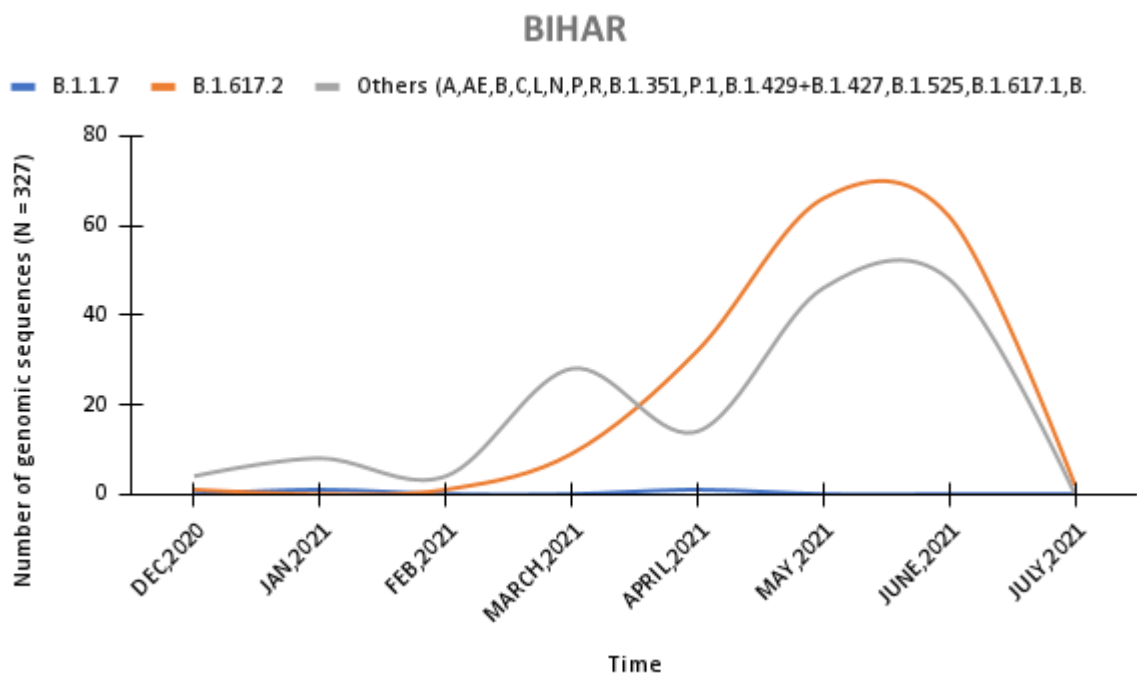

D

### CHANDIGARH

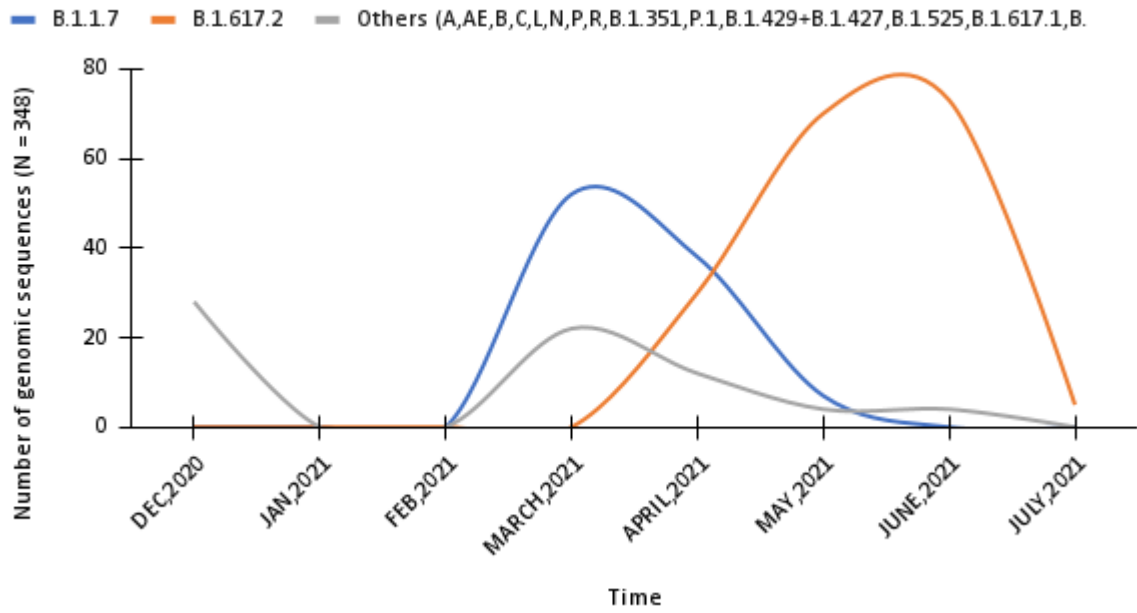

E

### CHHATTISGARH

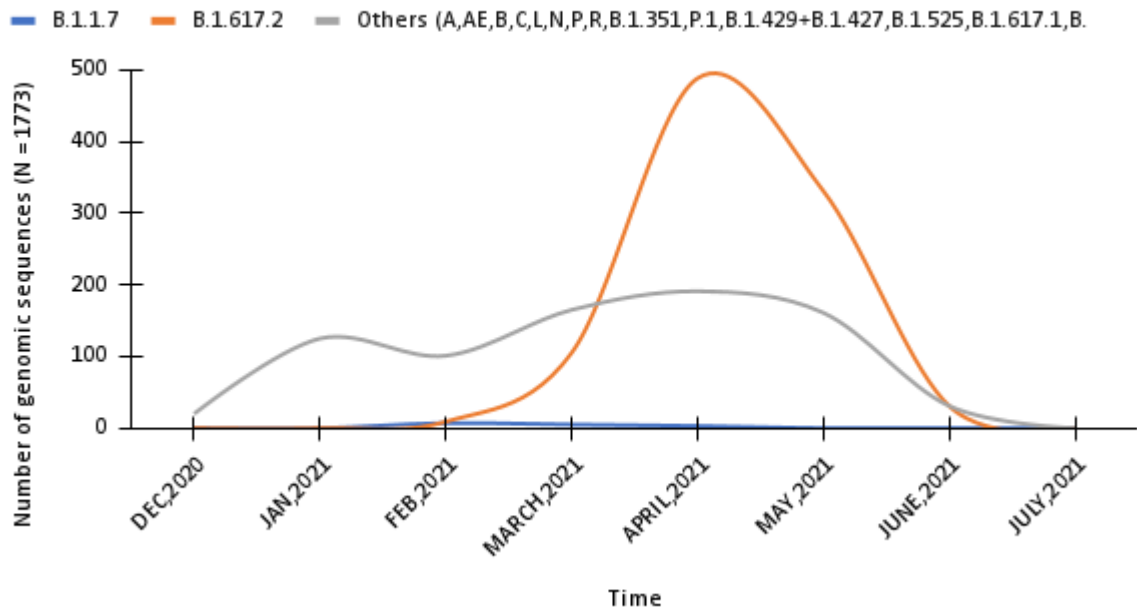

F

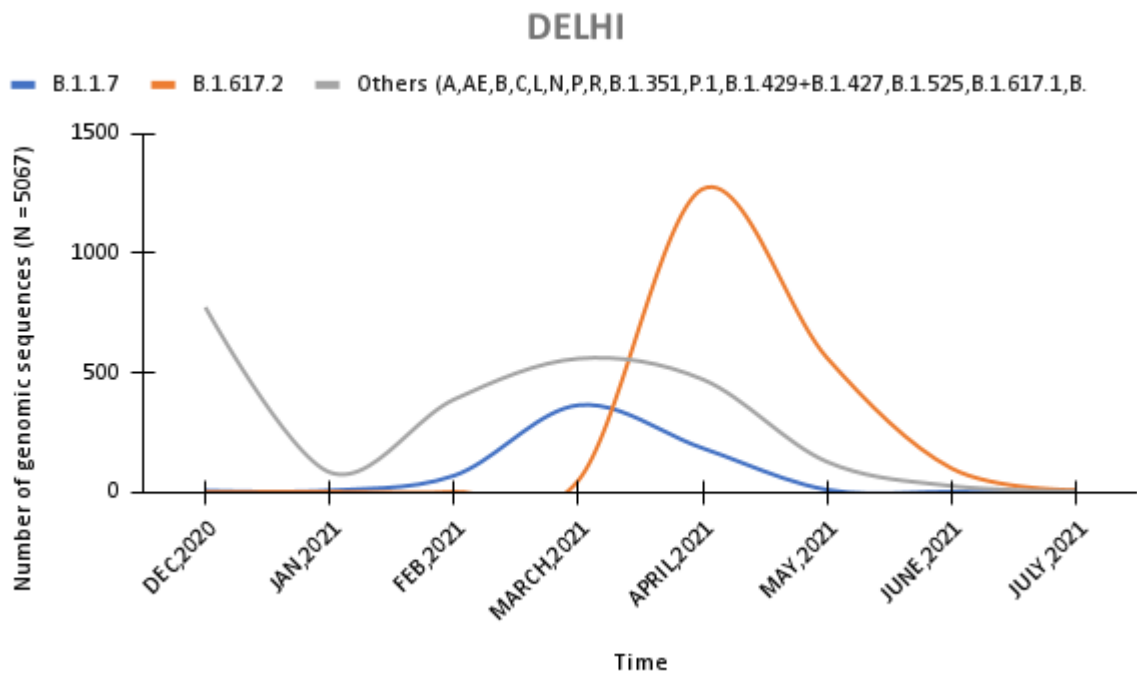

G

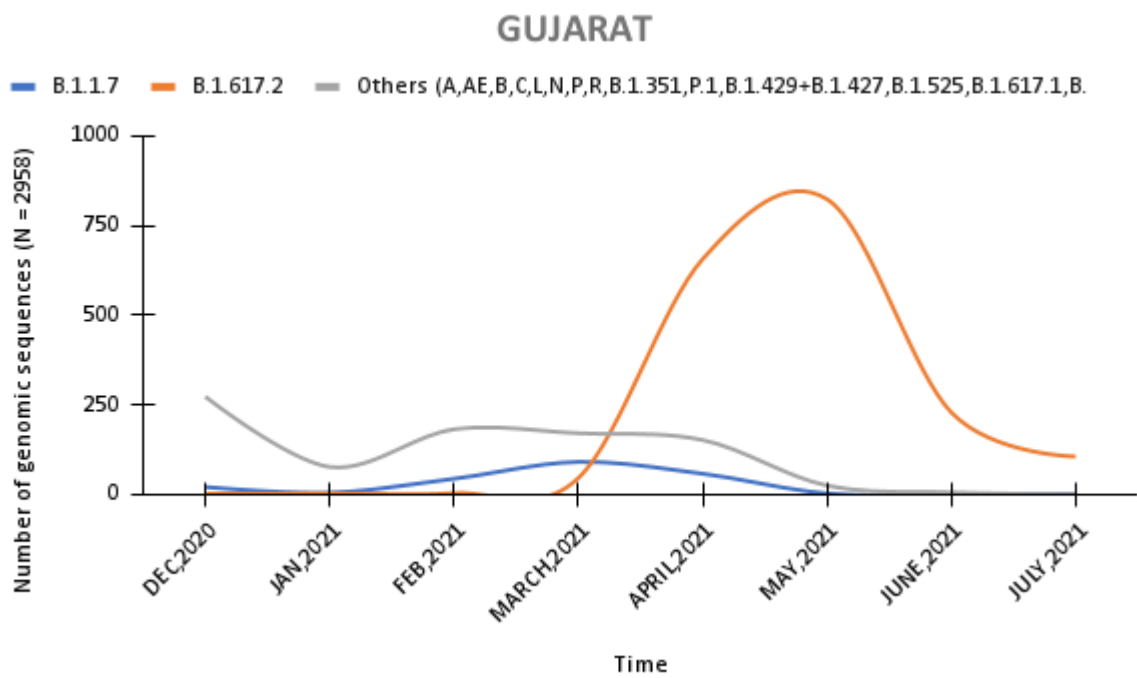

H

## GOA

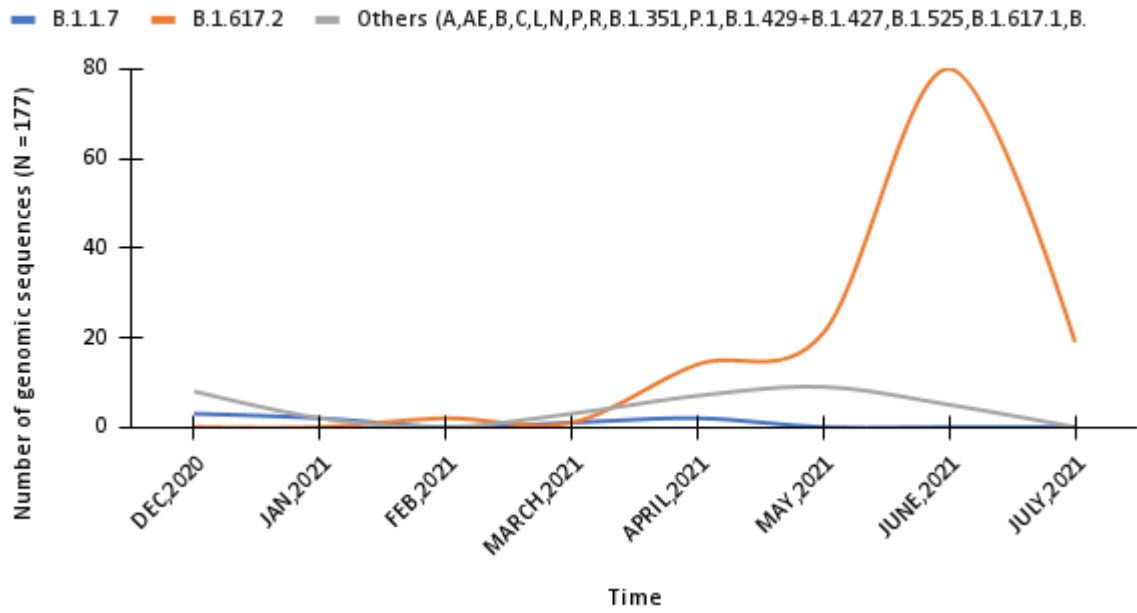

I

## HIMACHAL PRADESH

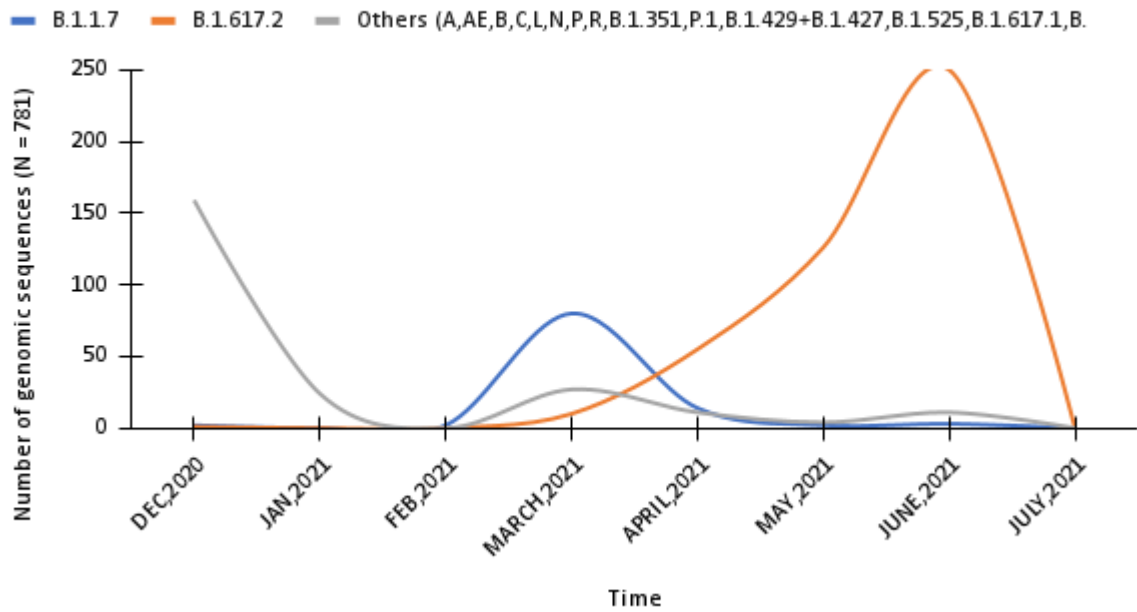

J

## HARYANA

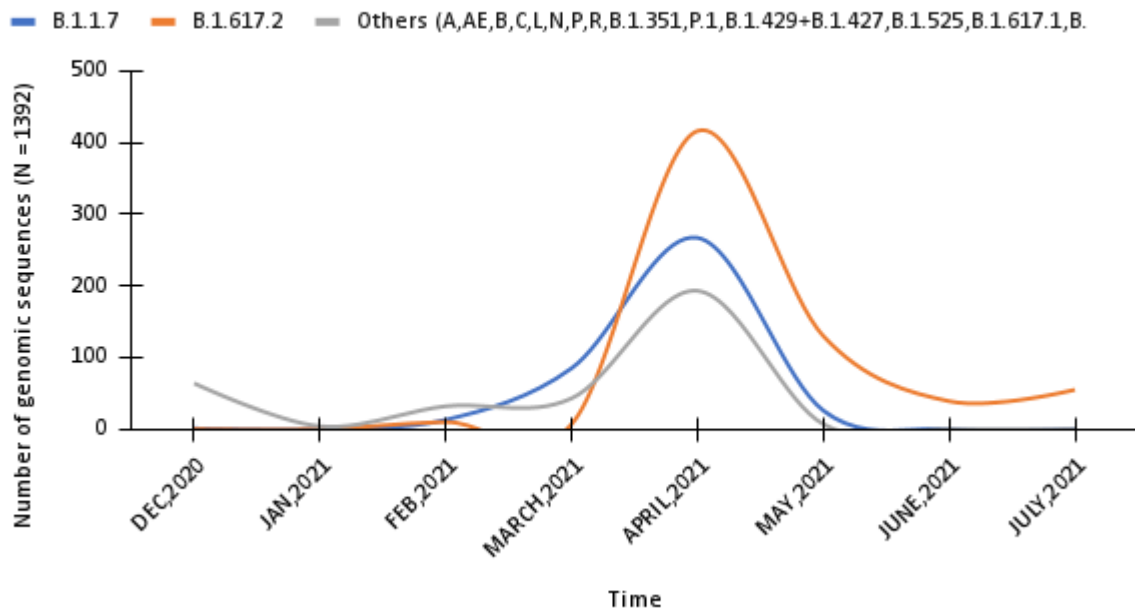

K

## JAMMU AND KASHMIR

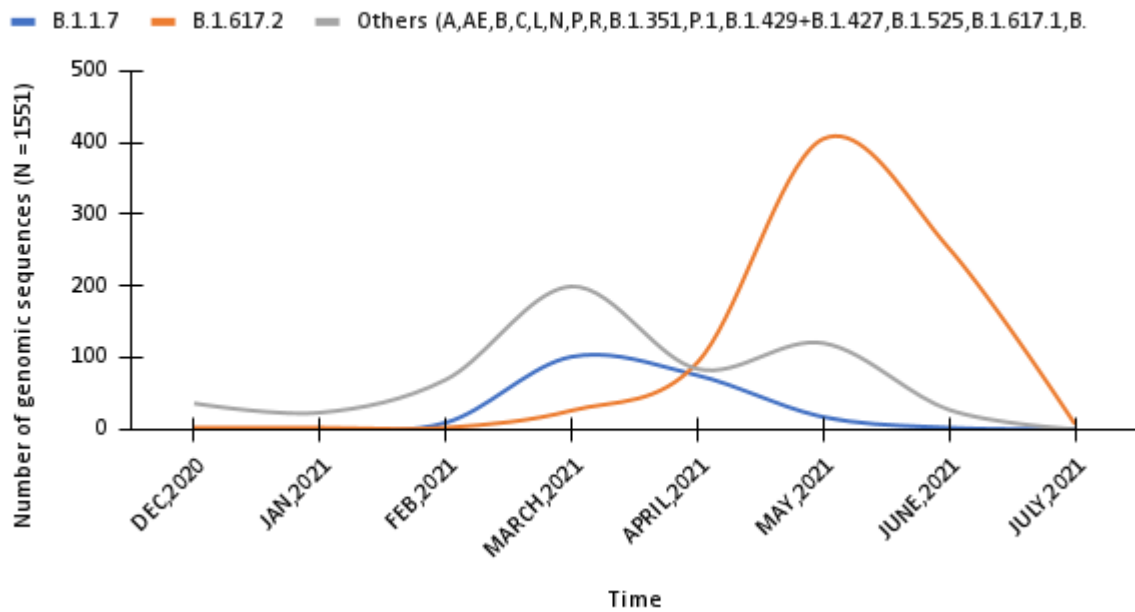

L

## JHARKHAND

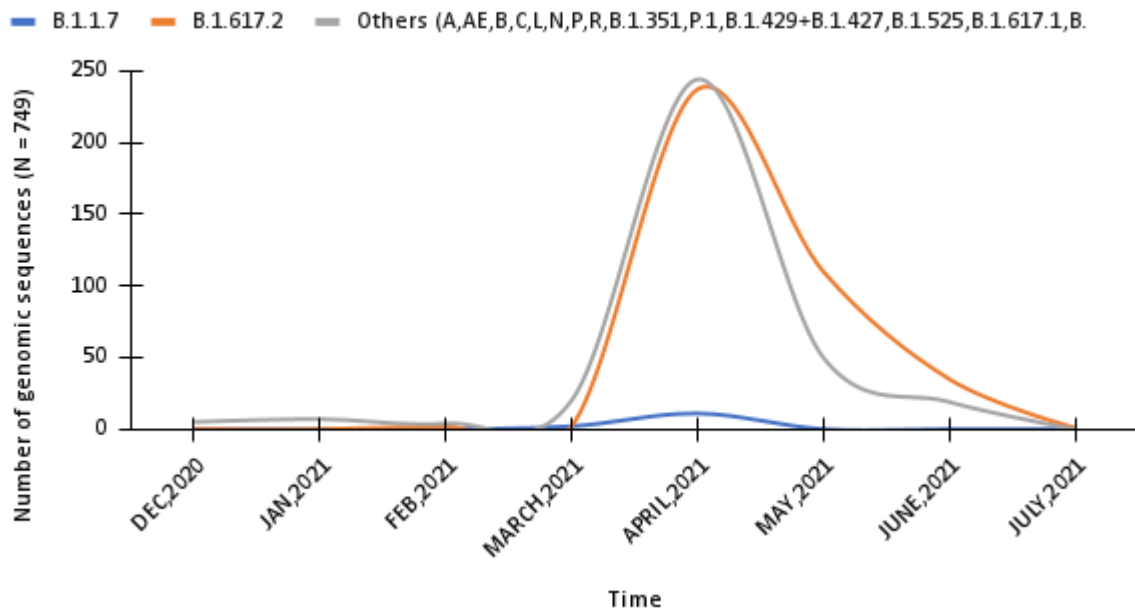

M

## KARNATAKA

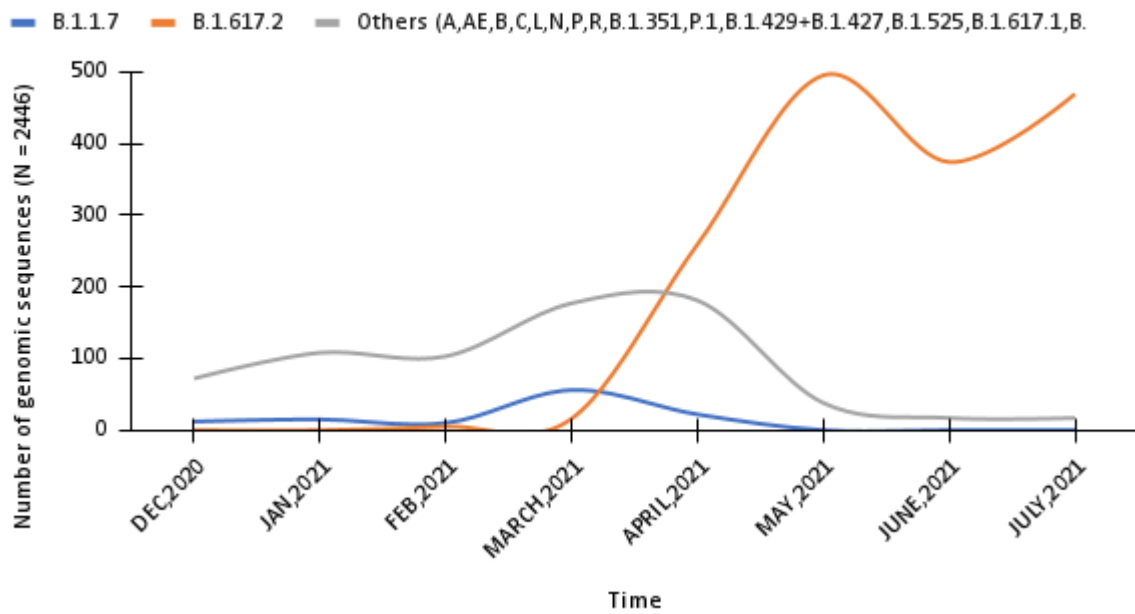

N



## KERALA

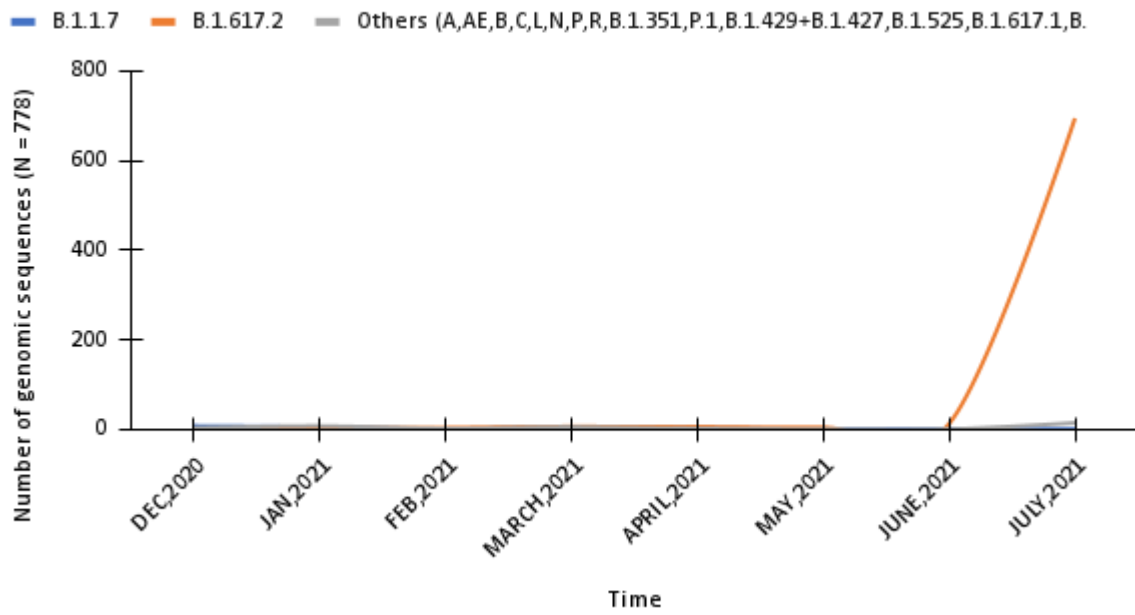

O

## LADAKAH

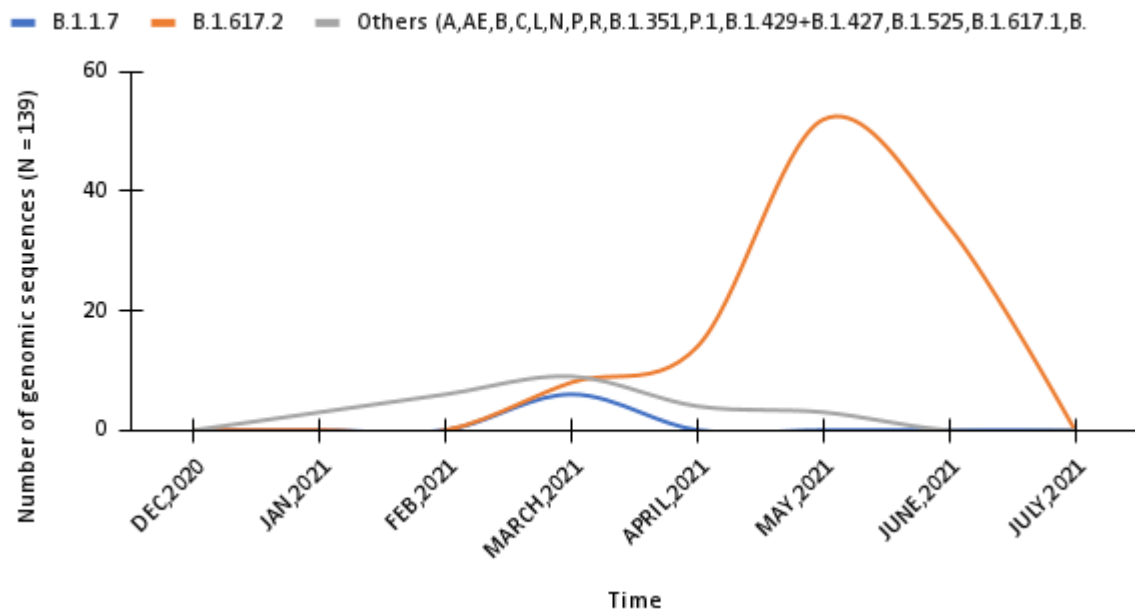

P

## MADHYA PRADESH

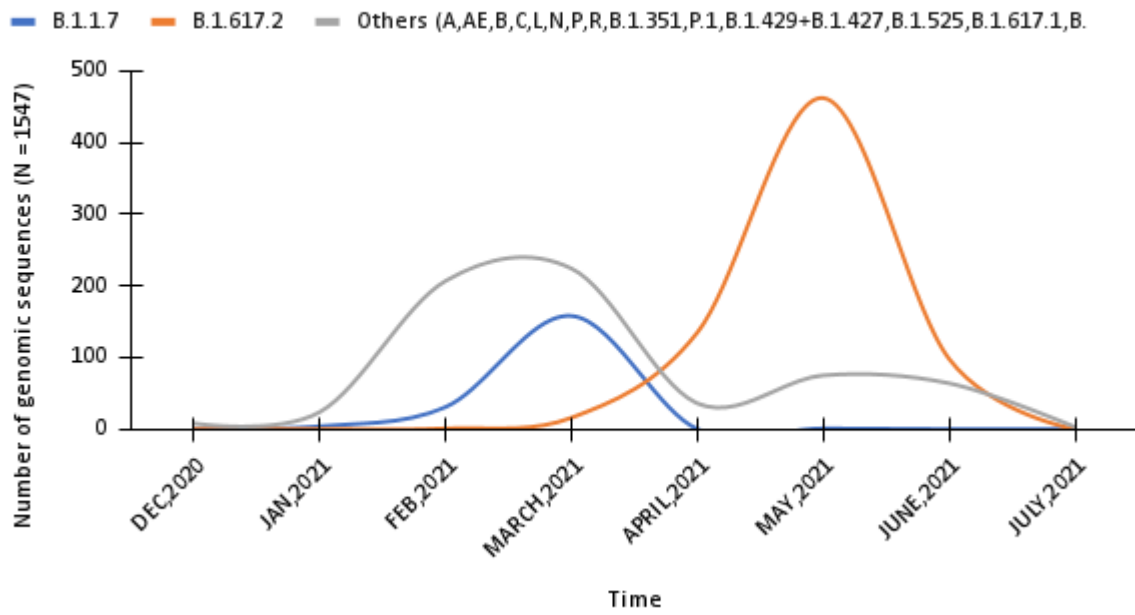

Q

## MANIPUR

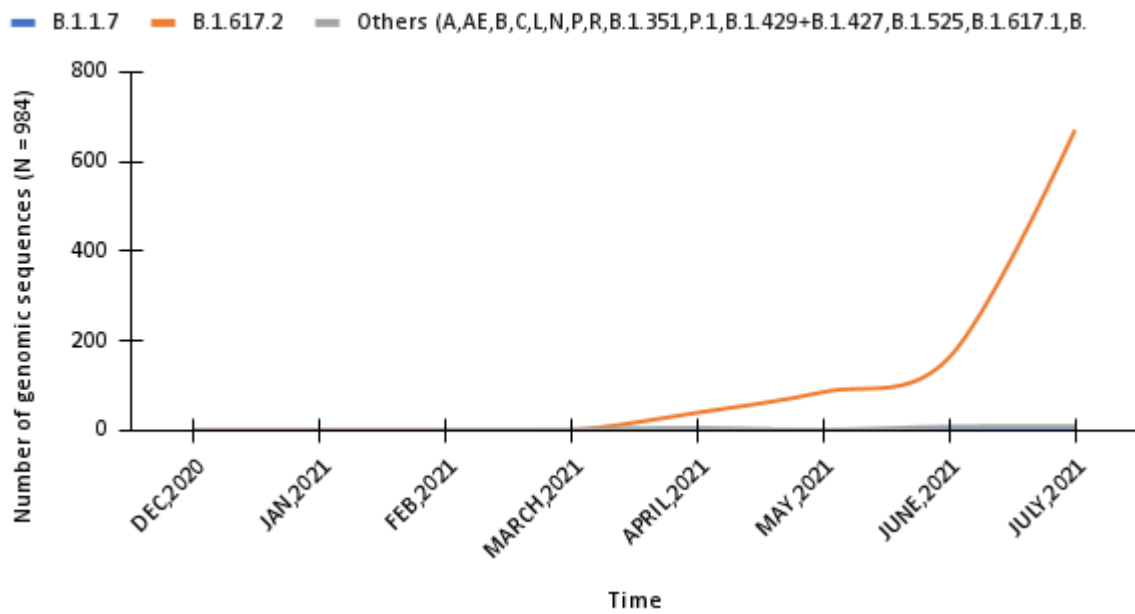

R

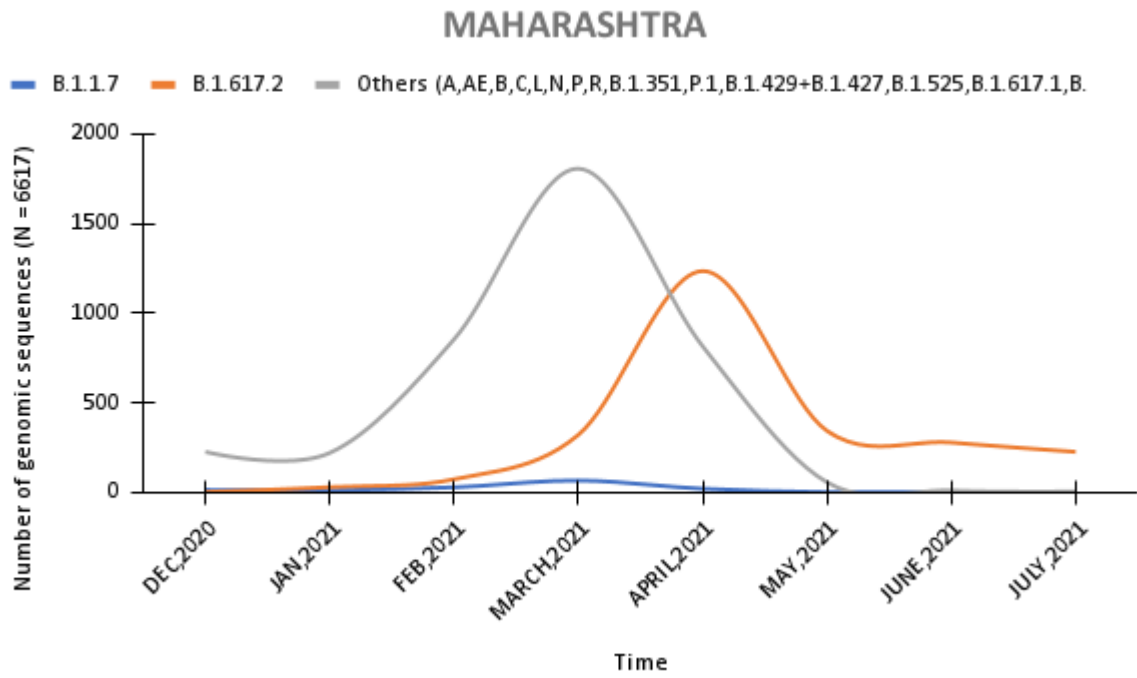

S

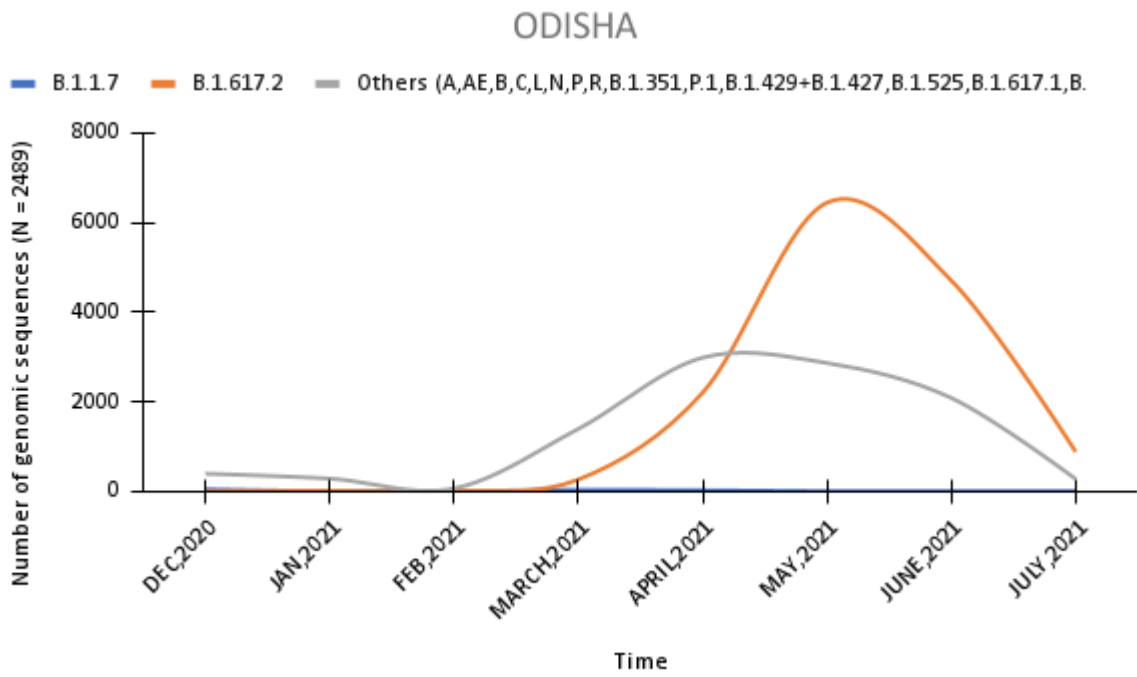

T

### PUDUCHERRY

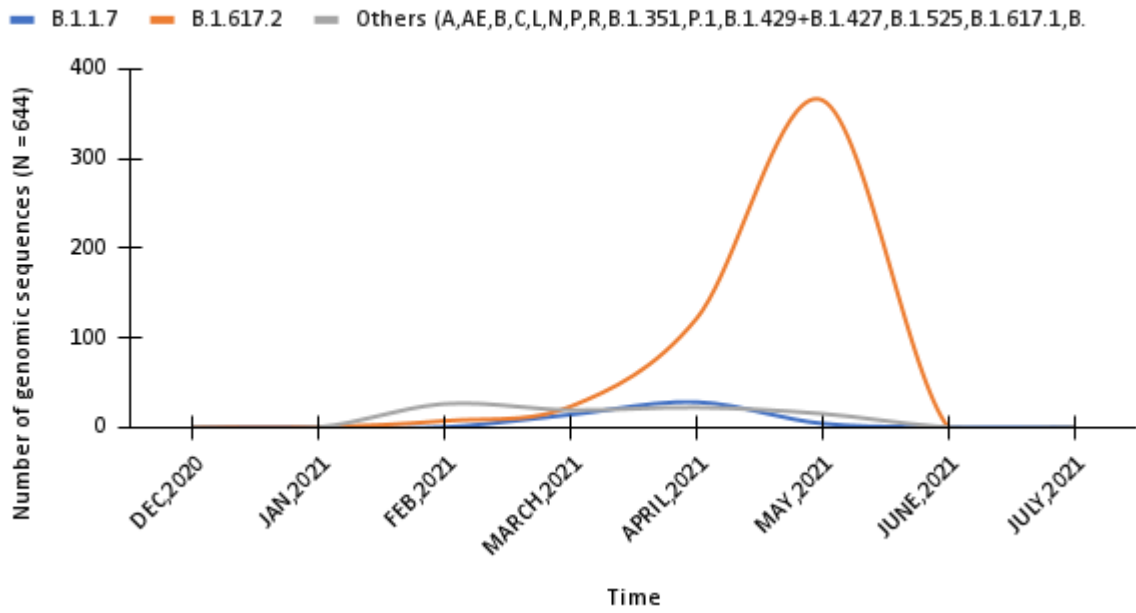

U

### PUNJAB

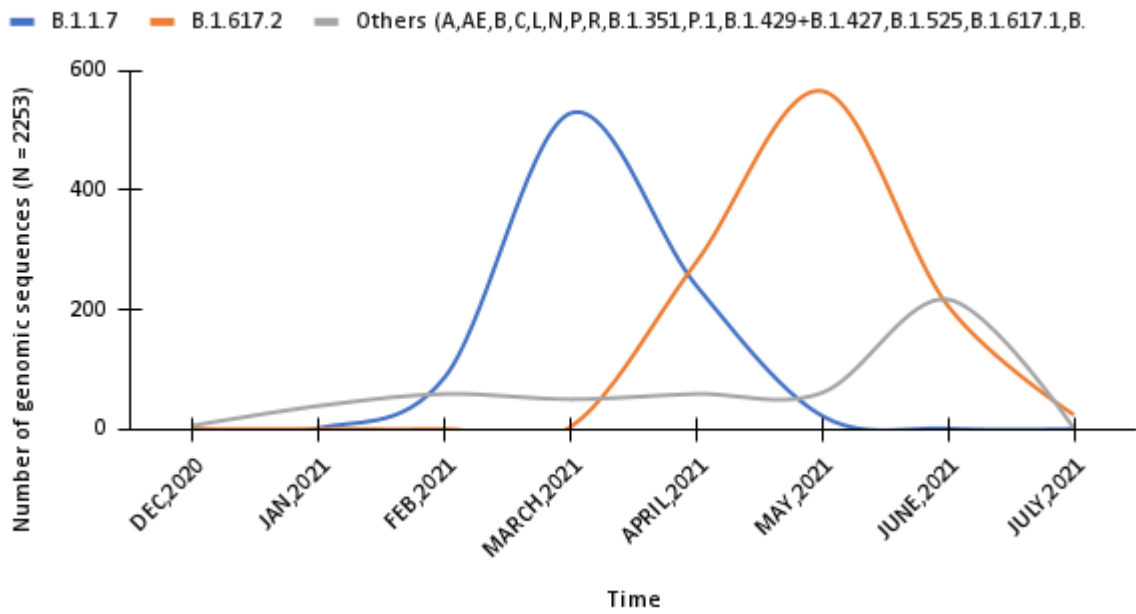

V

## RAJASTHAN

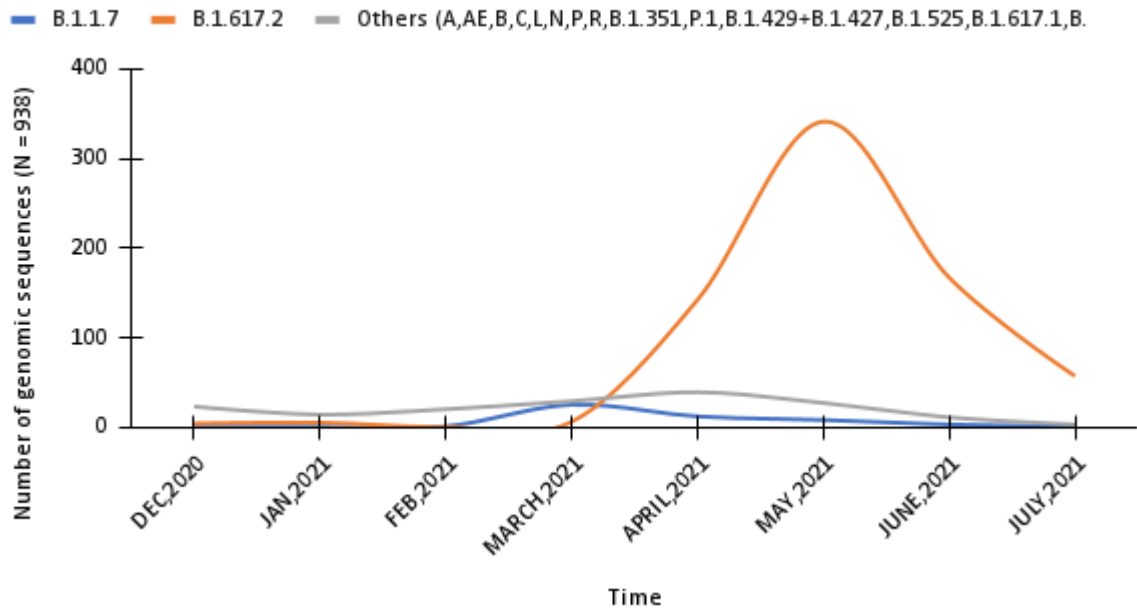

W

## SIKKIM

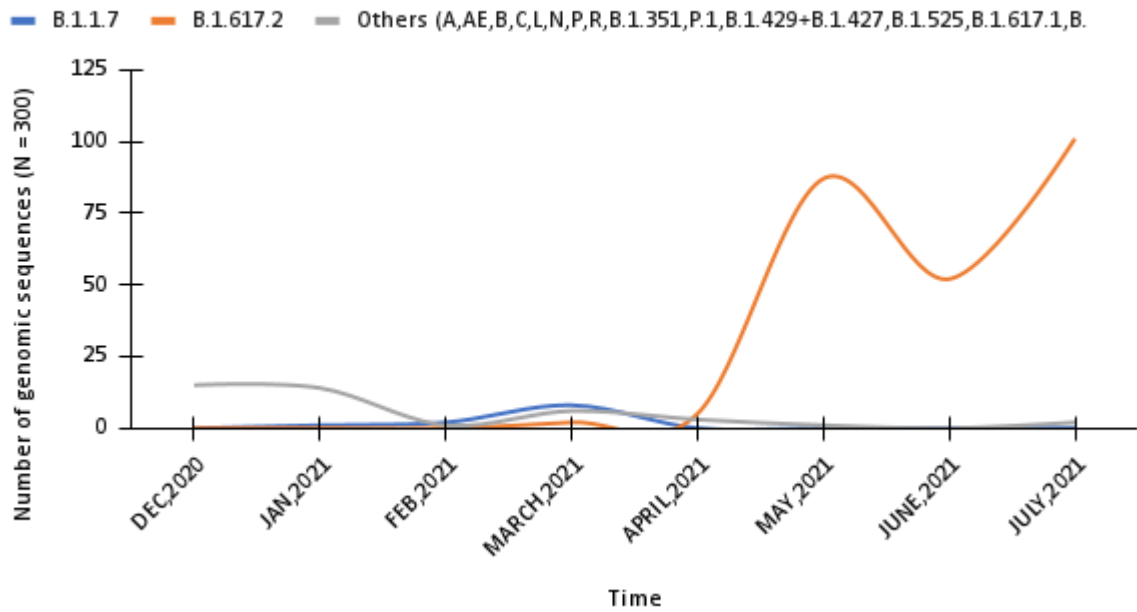

X

## TAMIL NADU

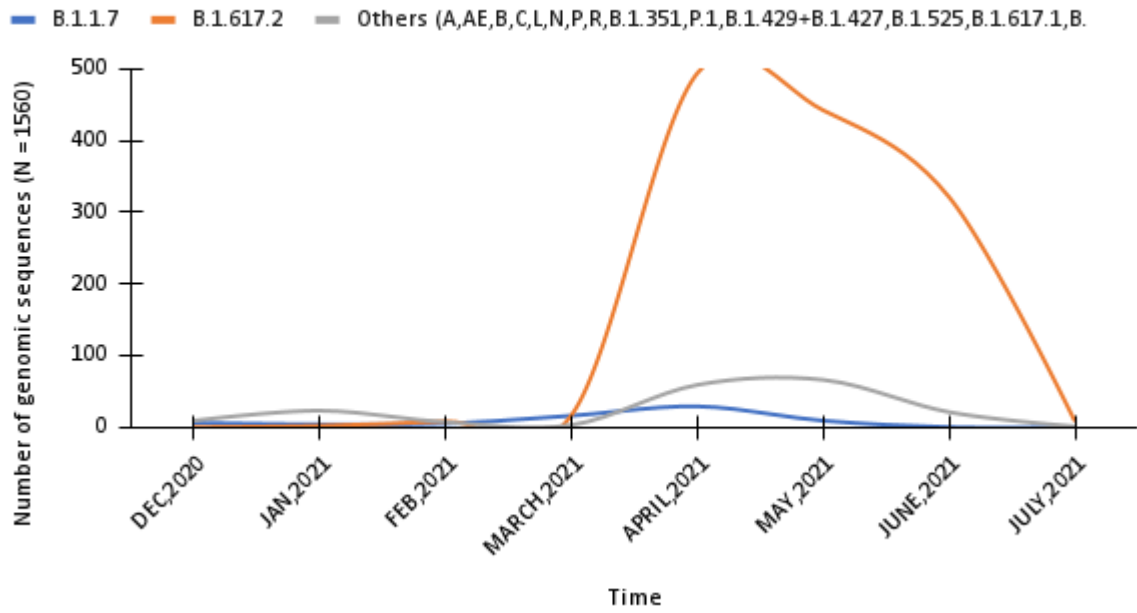

Y

## TELANGANA

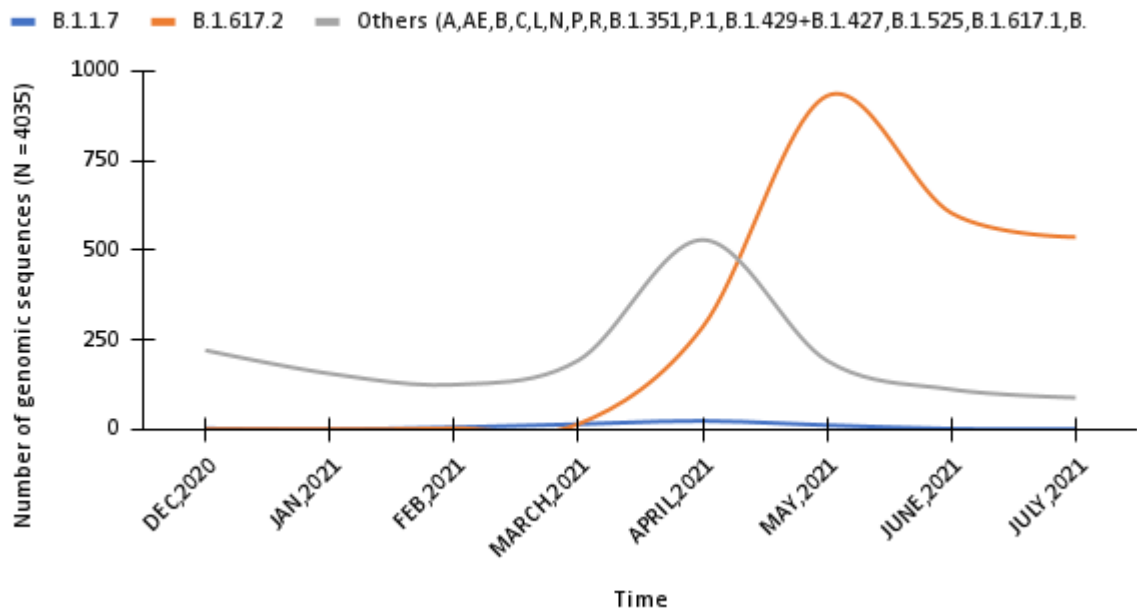

Z

## TRIPURA

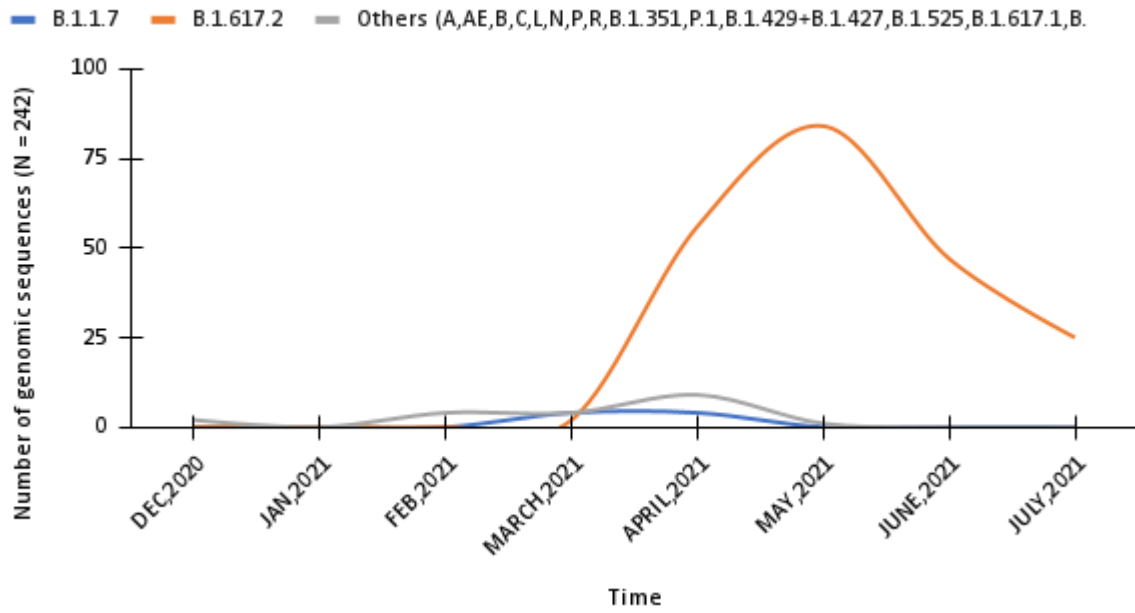

AA

## UTTAR PRADESH

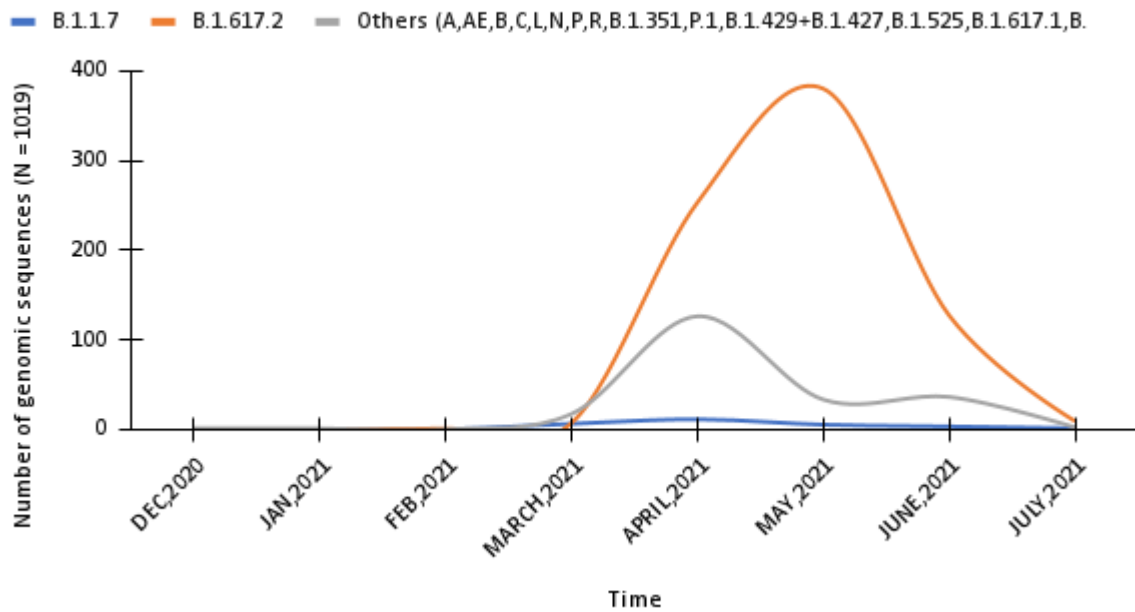

AB

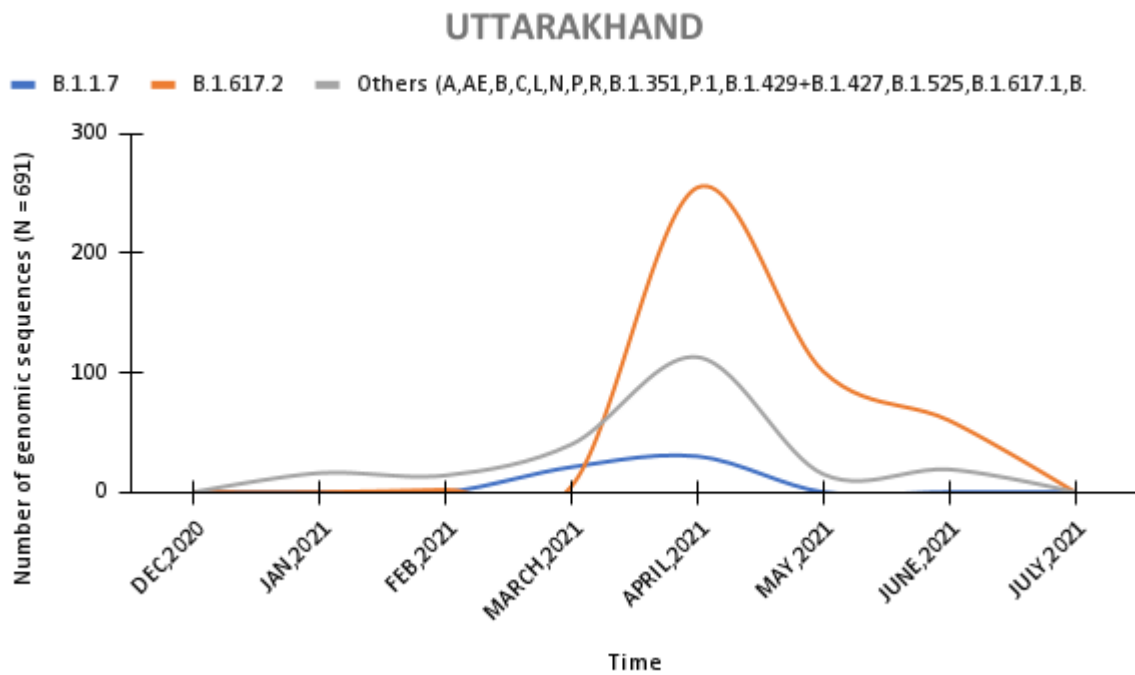

AC

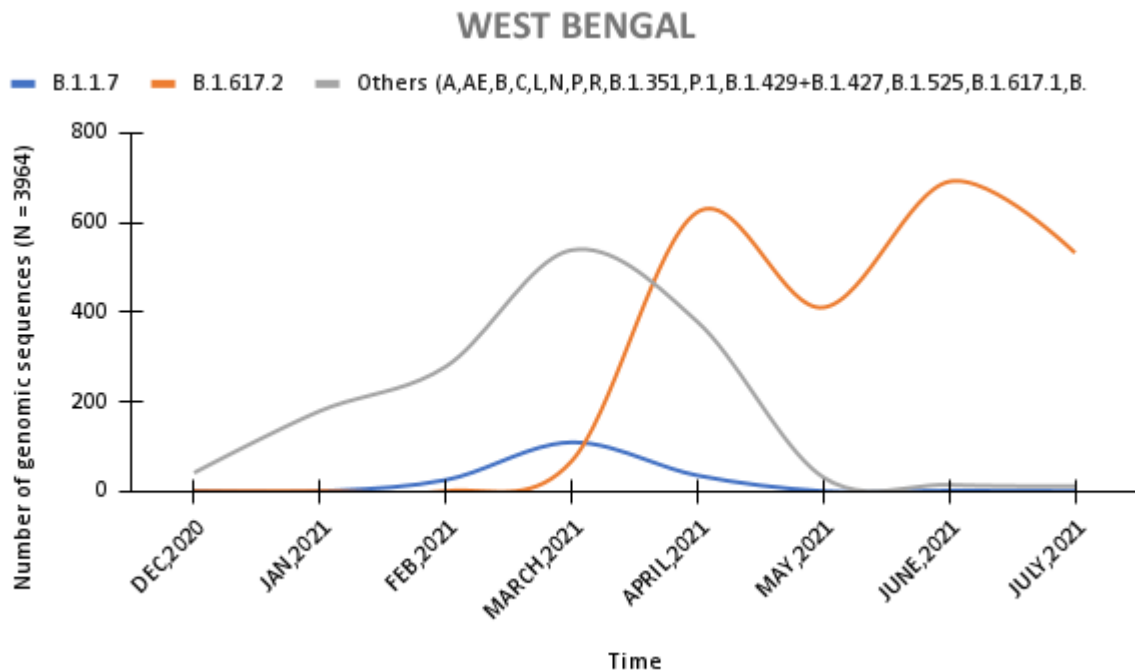

AD

**Figure S2 Monthly distribution of SARS-CoV-2 variants in genomic sequence data from states and union territories of India uploaded on GISAID database for the period of 1<sup>st</sup> December 2020 to 26<sup>th</sup> July 2021. Data source: SARS-CoV-2 genomic sequence—GISAID database: <https://www.gisaid.org>.**
