# Supplementary material for: Second wave of COVID-19 in India could be predicted with genomic surveillance of SARS-CoV-2 variants coupled with epidemiological data: A tool for future
Source: bioRxiv or medRxiv preprint supplement (doi:10.1101/2021.06.09.21258612), 2022-01-06
Supplement: Supplementary file [file media-1.pdf]

# Second wave of COVID-19 in India could be predicted with genomic surveillance of SARS-CoV-2 variants coupled with epidemiological data: A tool for future

Kumar et al., 2021

## Supplementary files:

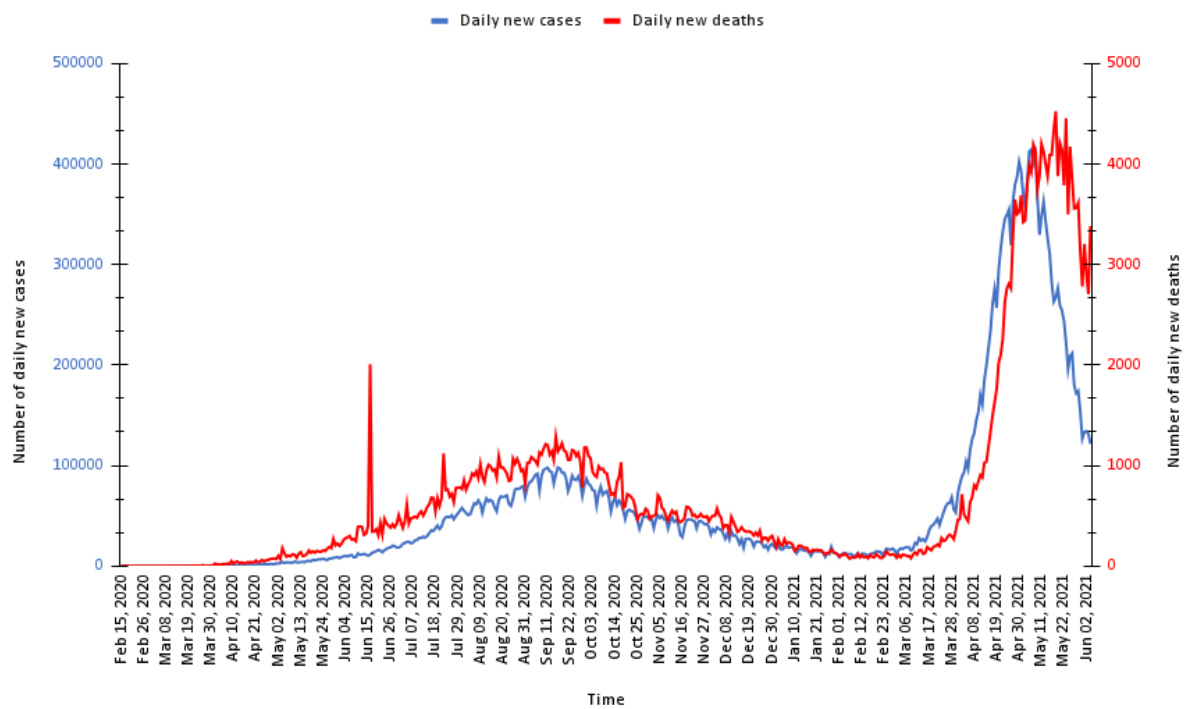

**Figure S1 Daily new COVID-19 cases and deaths in Indian population for the period of 15<sup>th</sup> February, 2020 to 2<sup>nd</sup> June, 2021.** (Data source: Worldometer: <https://www.worldometers.info/coronavirus/coronavirus/country/india>).

## ANDAMAN AND NICOBAR ISLANDS

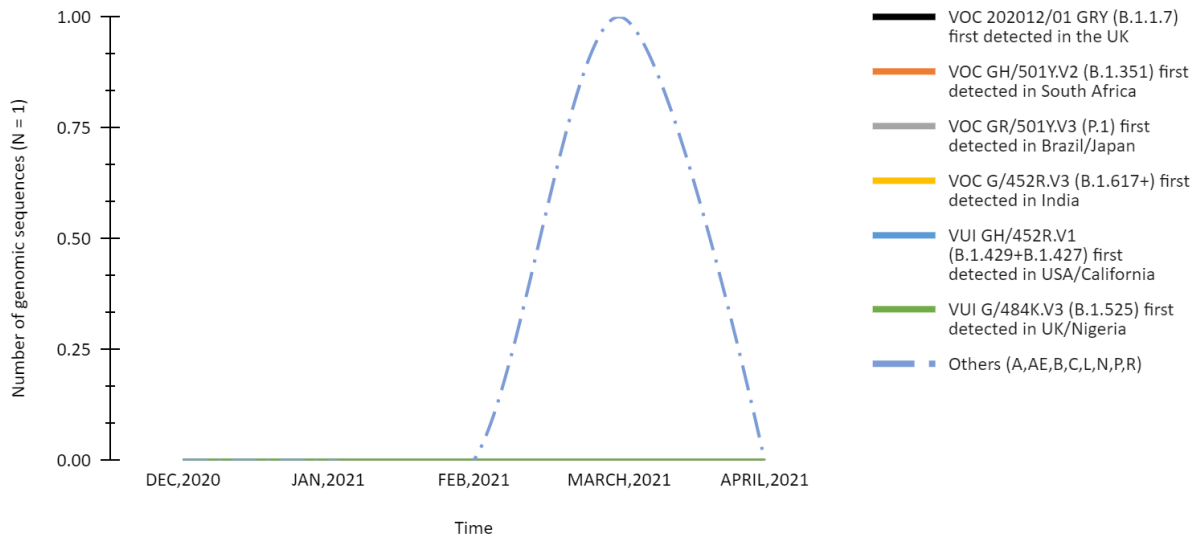

## ANDHRA PRADESH

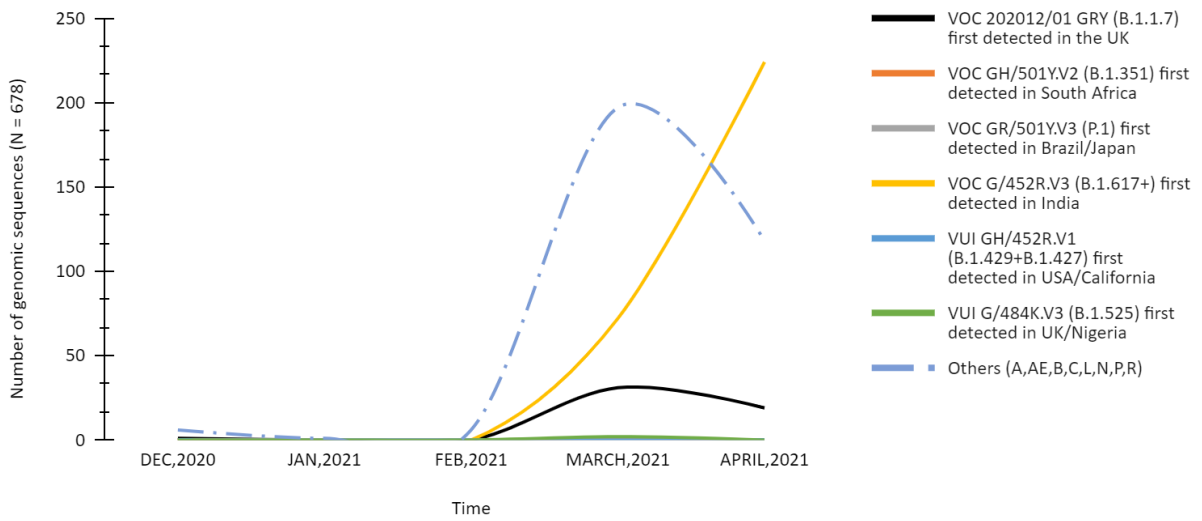

### ASSAM

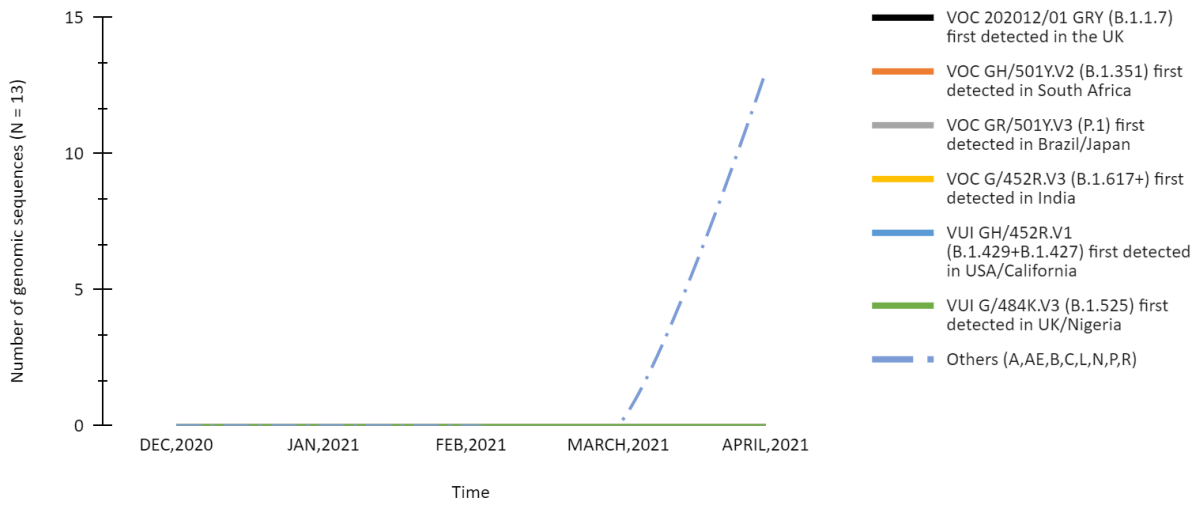

### BIHAR

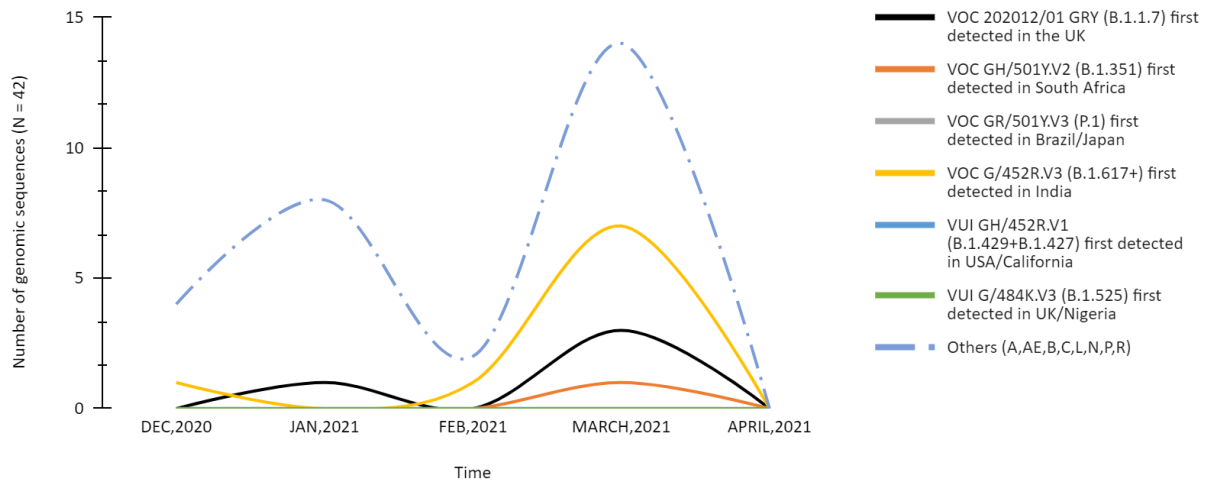

### CHANDIGARH

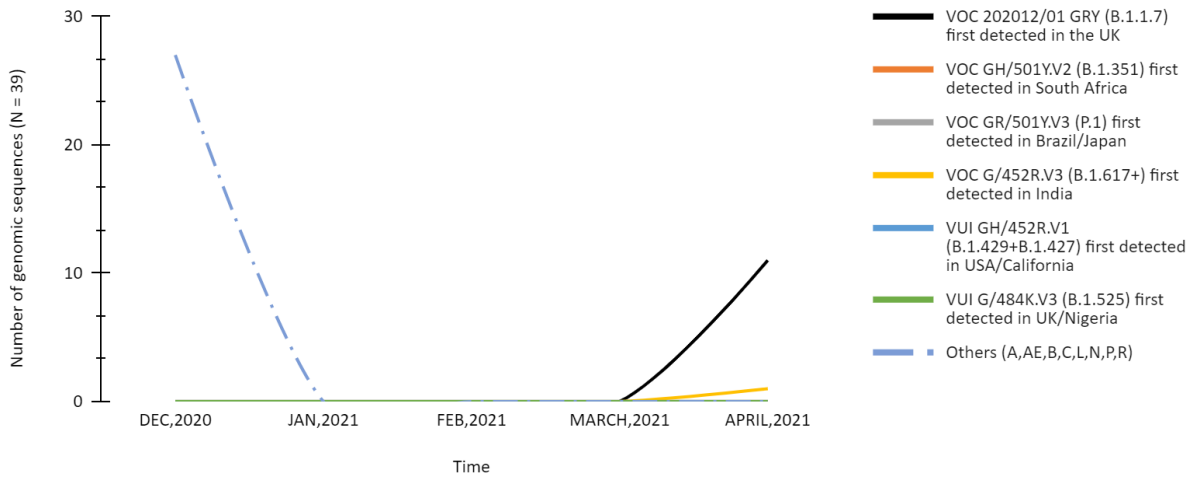

### CHHATTISGARH

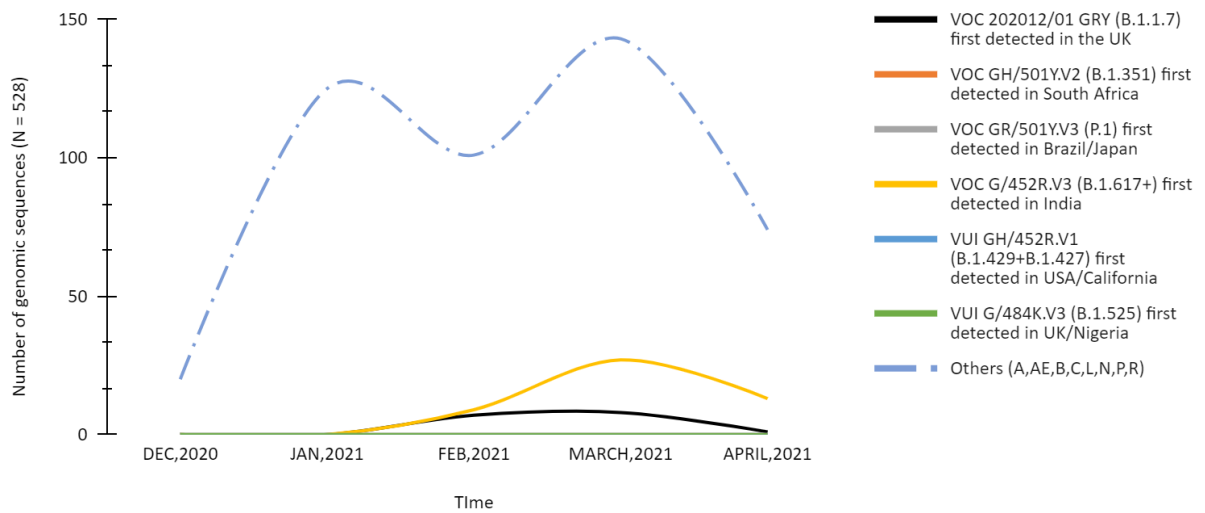

## DELHI

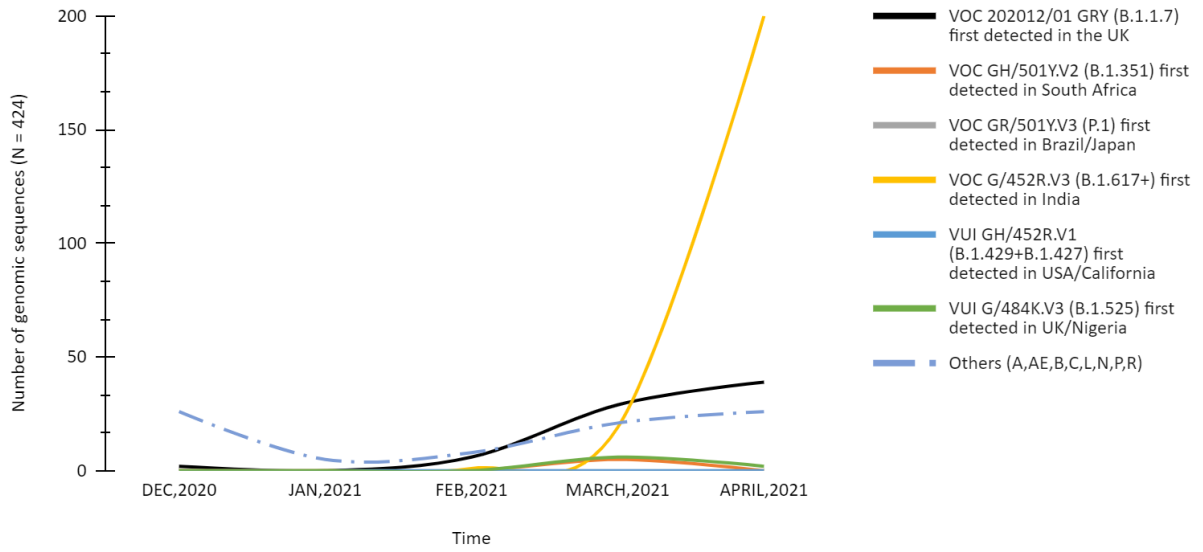

## GUJARAT

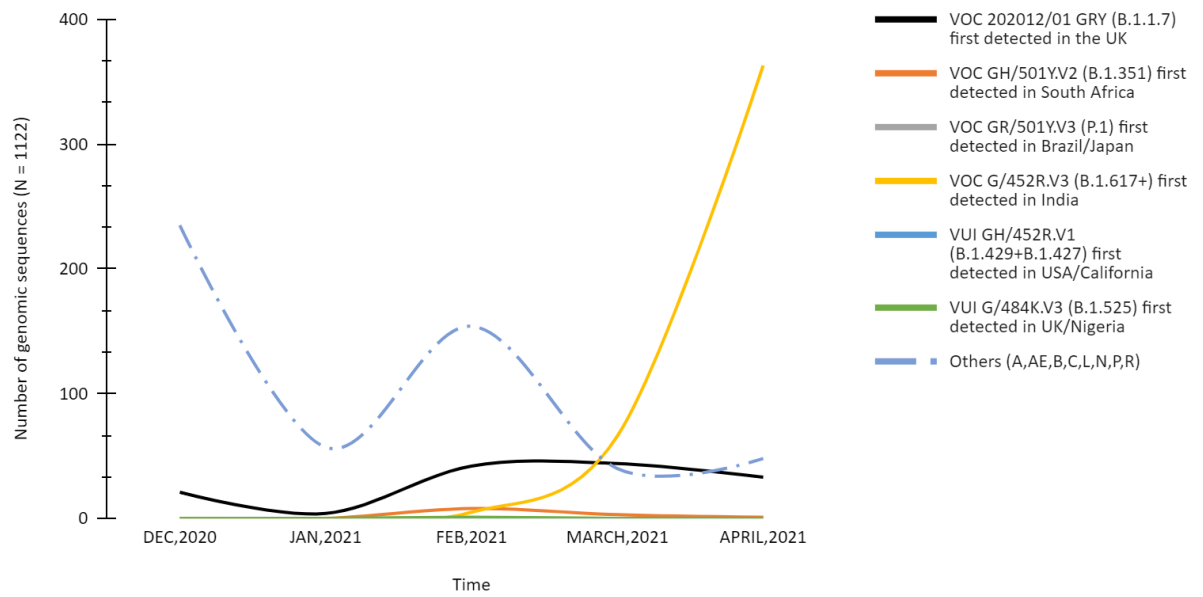

## GOA

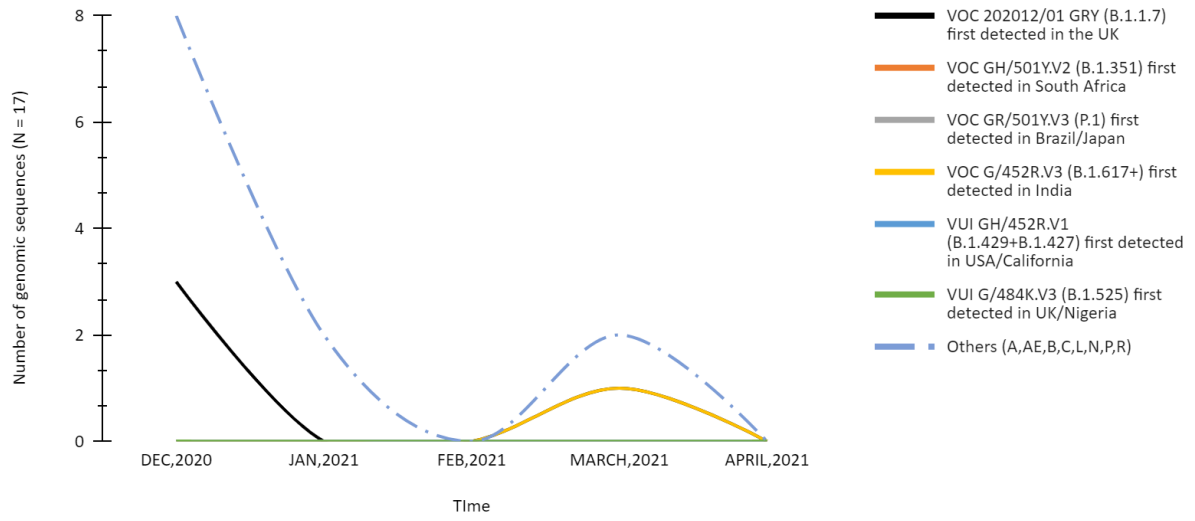

## HIMACHAL PRADESH

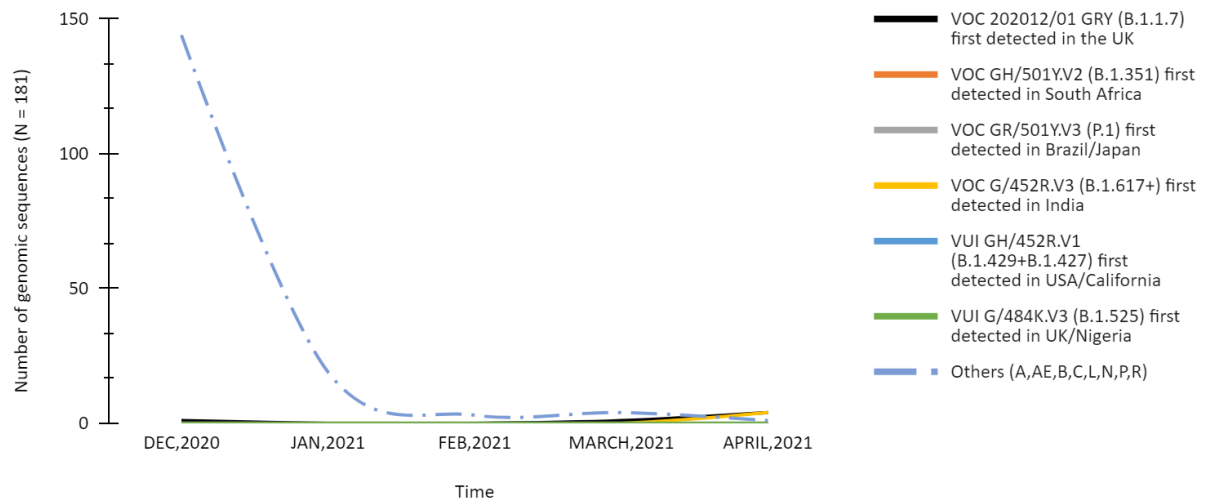

### HARYANA

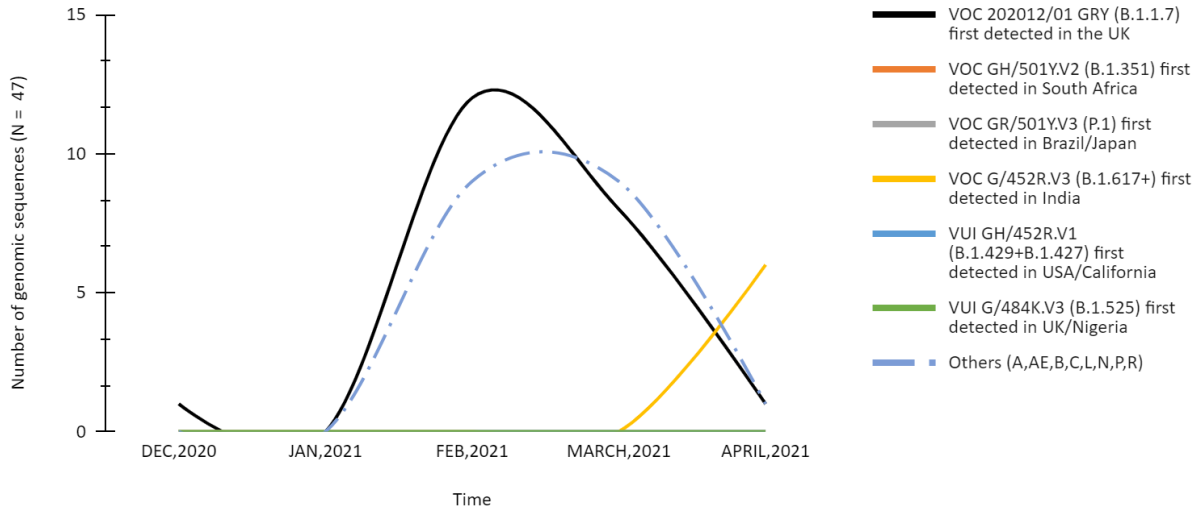

### JAMMU AND KASHMIR

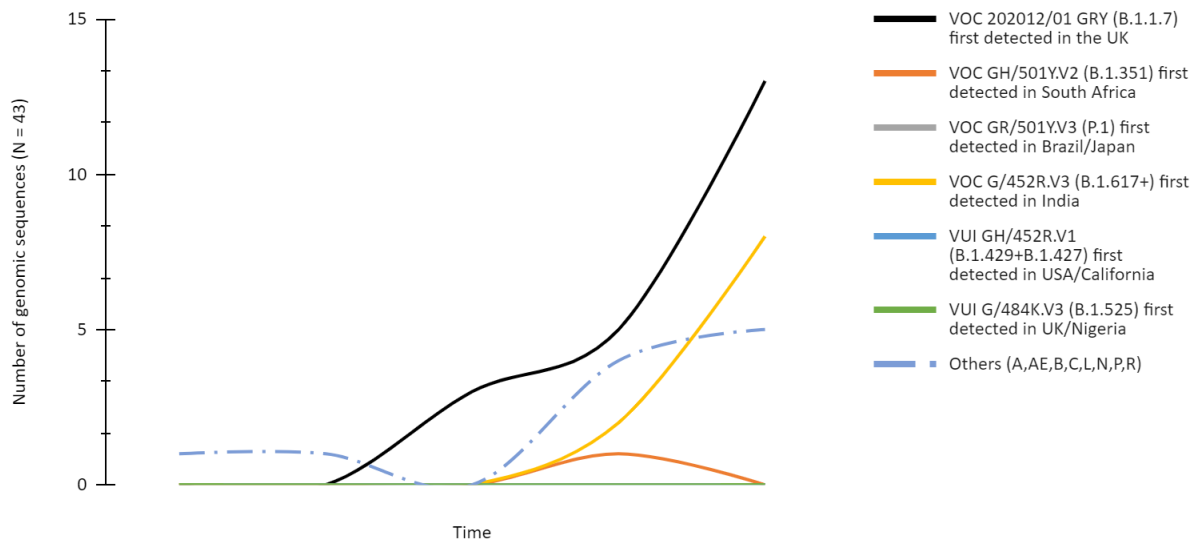

### JHARKHAND

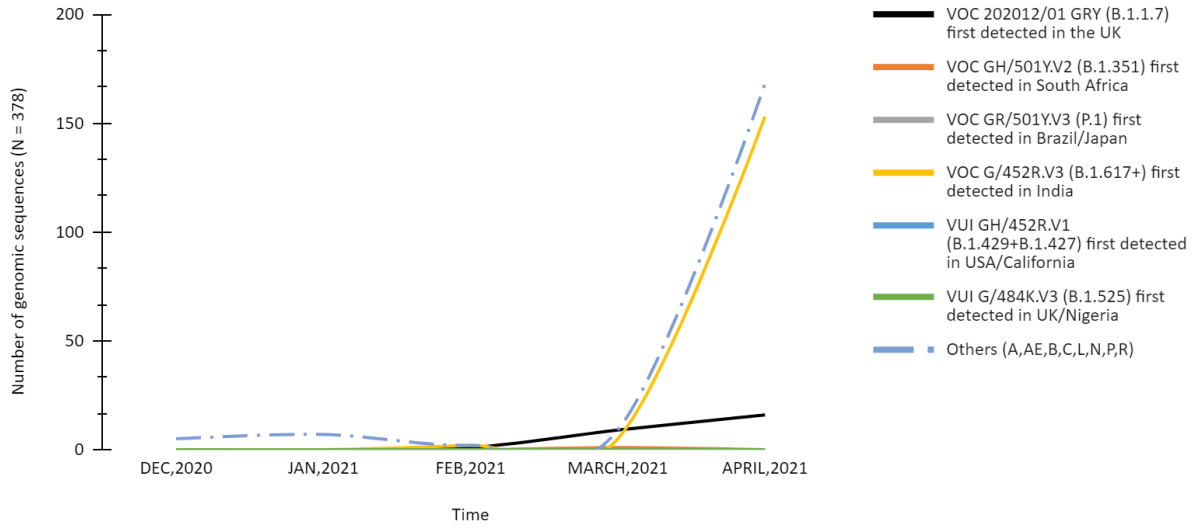

### KARNATAKA

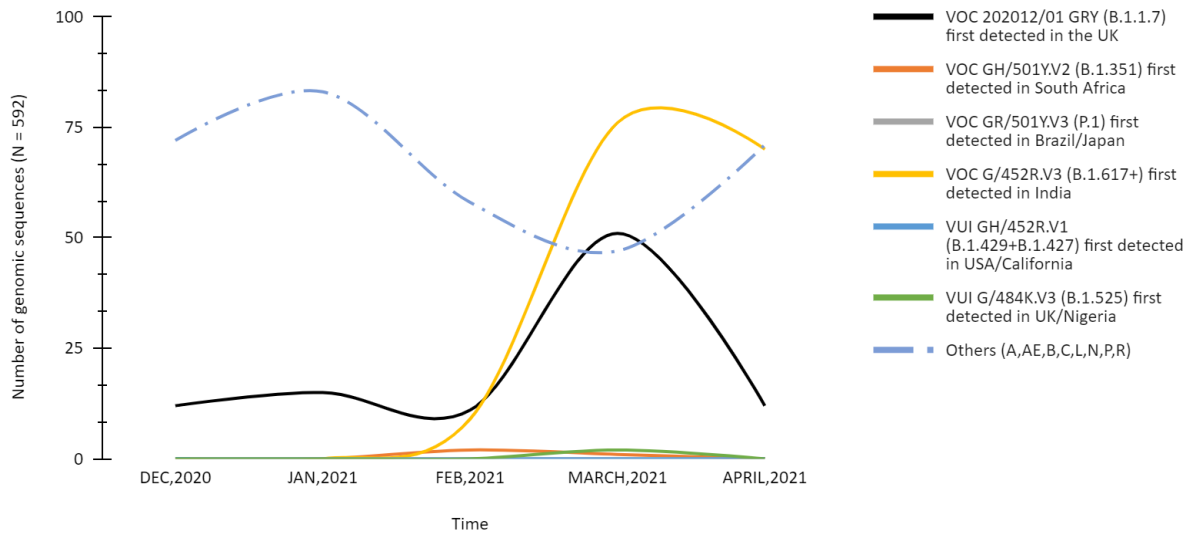





### MADHYA PRADESH

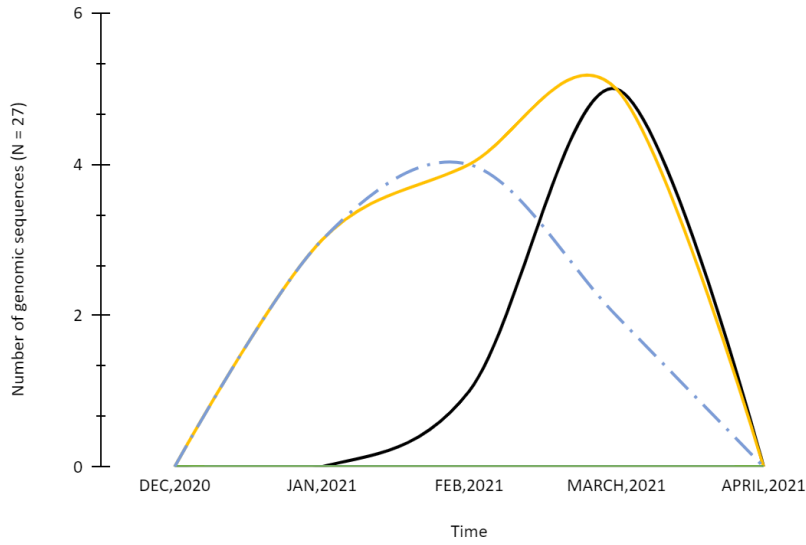

- VOC 202012/01 GRY (B.1.1.7) first detected in the UK
- VOC GH/501YV2 (B.1.351) first detected in South Africa
- VOC GR/501YV3 (P.1) first detected in Brazil/Japan
- VOC G/452R.V3 (B.1.617+) first detected in India
- VUI GH/452R.V1 (B.1.429+B.1.427) first detected in USA/California
- VUI G/484K.V3 (B.1.525) first detected in UK/Nigeria
- Others (A,AE,B,C,L,N,P,R)

### MANIPUR

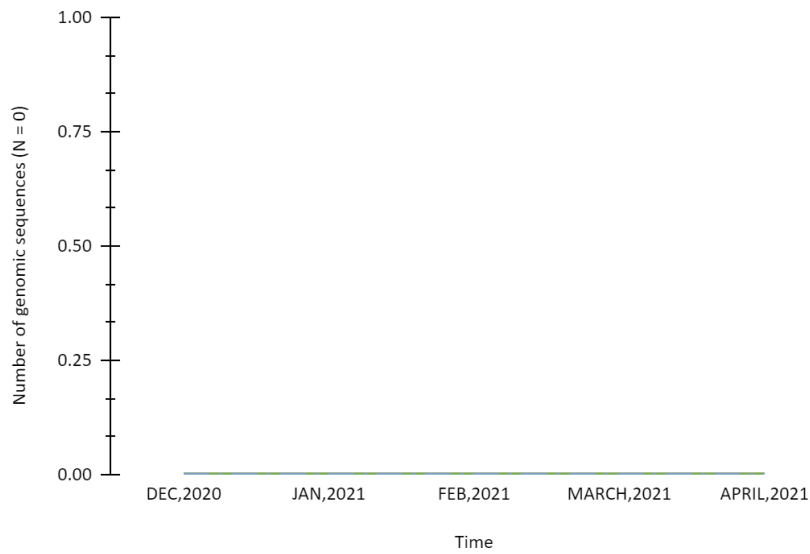

- VOC 202012/01 GRY (B.1.1.7) first detected in the UK
- VOC GH/501YV2 (B.1.351) first detected in South Africa
- VOC GR/501YV3 (P.1) first detected in Brazil/Japan
- VOC G/452R.V3 (B.1.617+) first detected in India
- VUI GH/452R.V1 (B.1.429+B.1.427) first detected in USA/California
- VUI G/484K.V3 (B.1.525) first detected in UK/Nigeria
- Others (A,AE,B,C,L,N,P,R)

## MAHARASHTRA

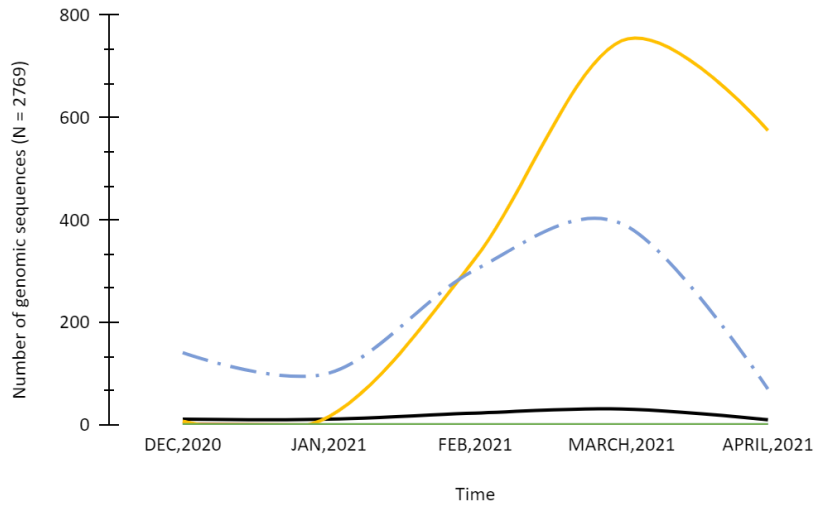

- VOC 202012/01 GRY (B.1.1.7) first detected in the UK
- VOC GH/501Y.V2 (B.1.351) first detected in South Africa
- VOC GR/501Y.V3 (P.1) first detected in Brazil/Japan
- VOC G/452R.V3 (B.1.617+) first detected in India
- VUI GH/452R.V1 (B.1.429+B.1.427) first detected in USA/California
- VUI G/484K.V3 (B.1.525) first detected in UK/Nigeria
- Others (A,AE,B,C,L,N,P,R)

## ODISHA

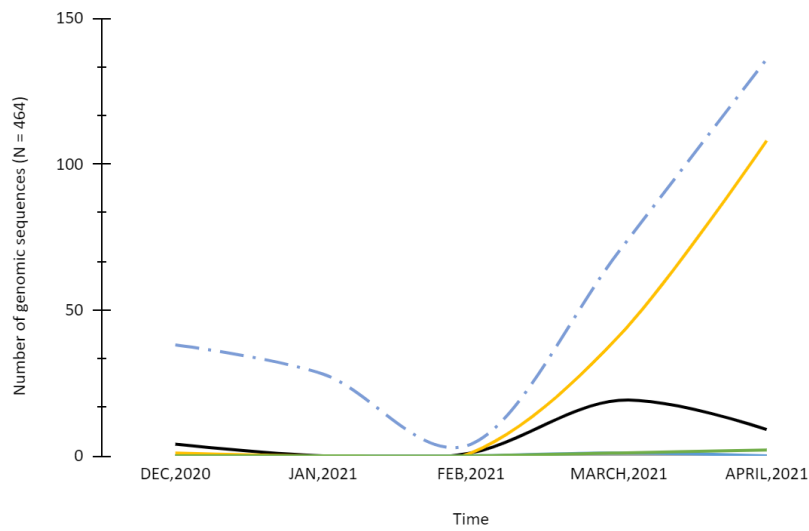

- VOC 202012/01 GRY (B.1.1.7) first detected in the UK
- VOC GH/501Y.V2 (B.1.351) first detected in South Africa
- VOC GR/501Y.V3 (P.1) first detected in Brazil/Japan
- VOC G/452R.V3 (B.1.617+) first detected in India
- VUI GH/452R.V1 (B.1.429+B.1.427) first detected in USA/California
- VUI G/484K.V3 (B.1.525) first detected in UK/Nigeria
- Others (A,AE,B,C,L,N,P,R)

## PUDUCHERRY

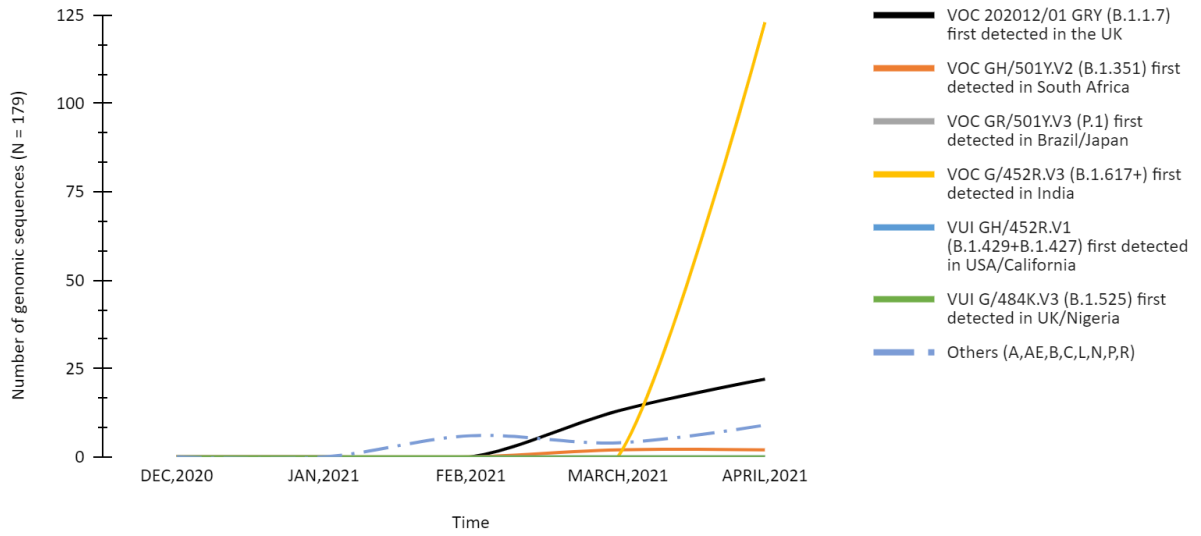

## PUNJAB

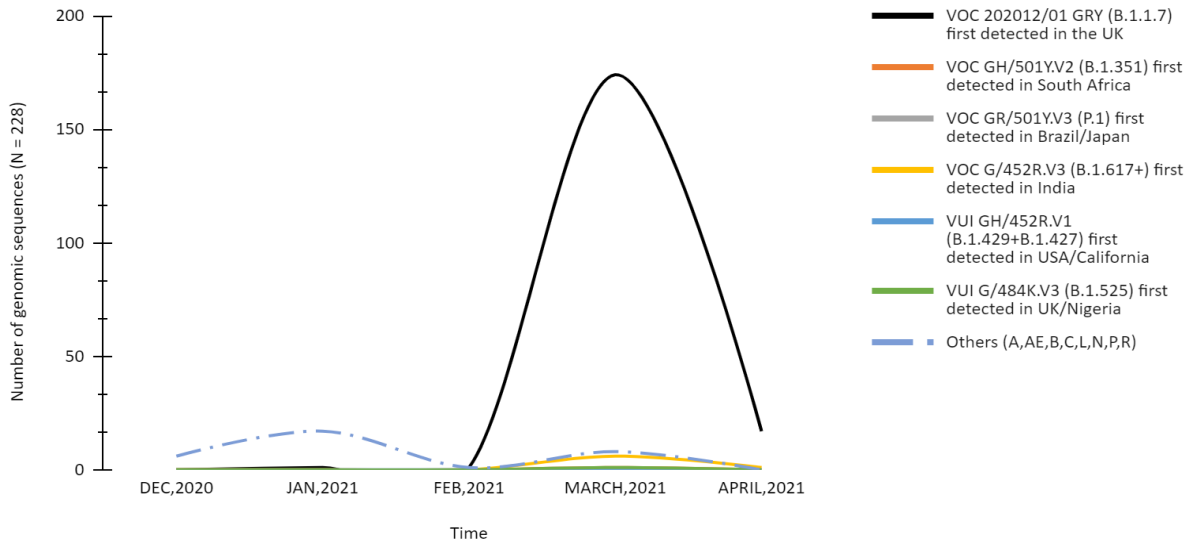

## RAJASTHAN

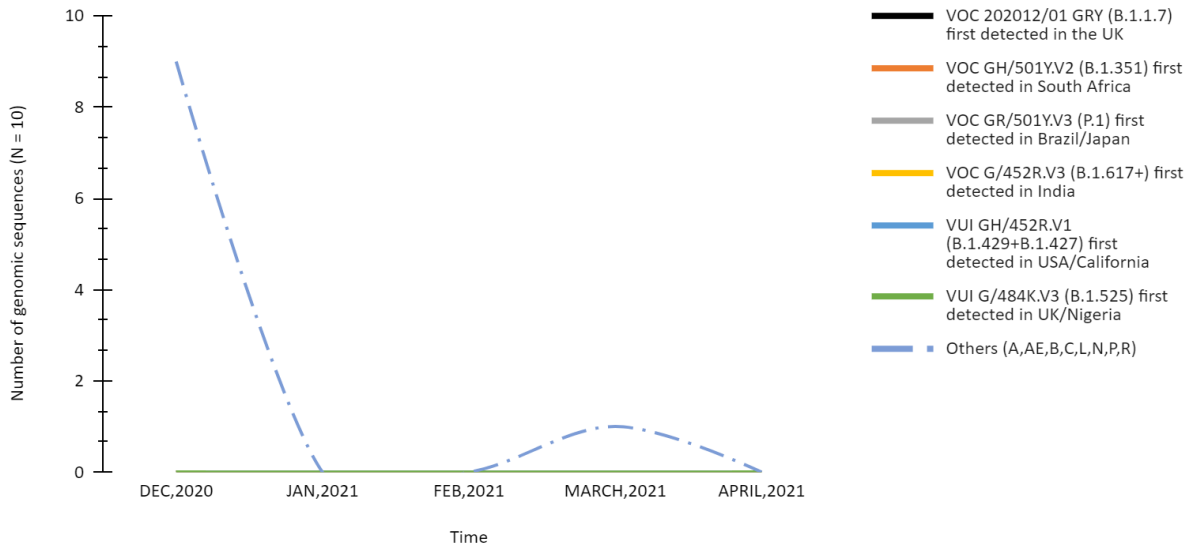

## SIKKIM

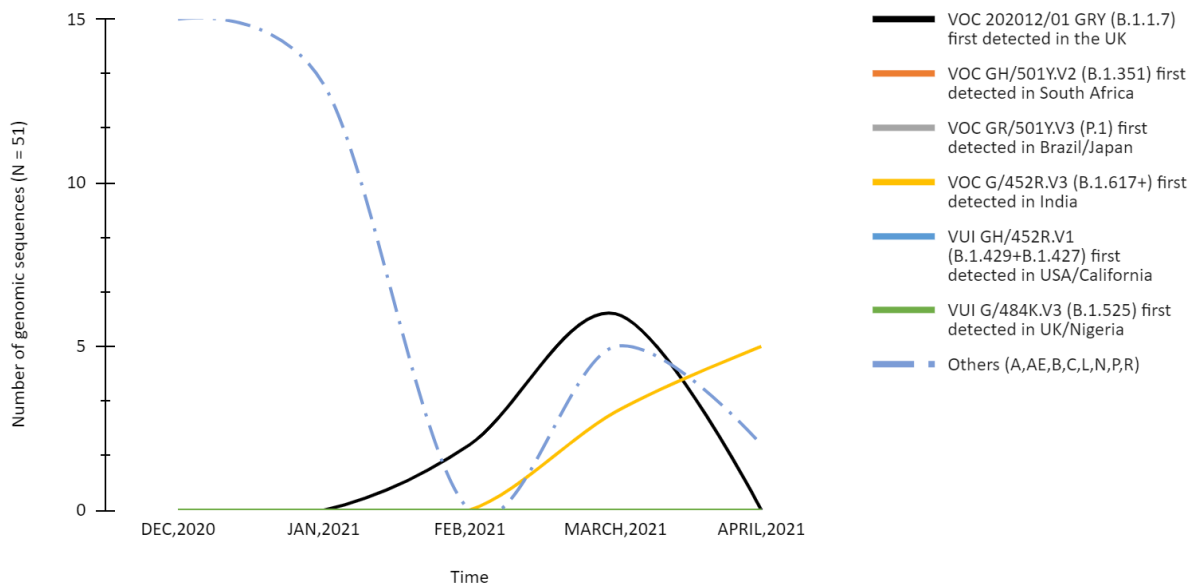

### TAMIL NADU

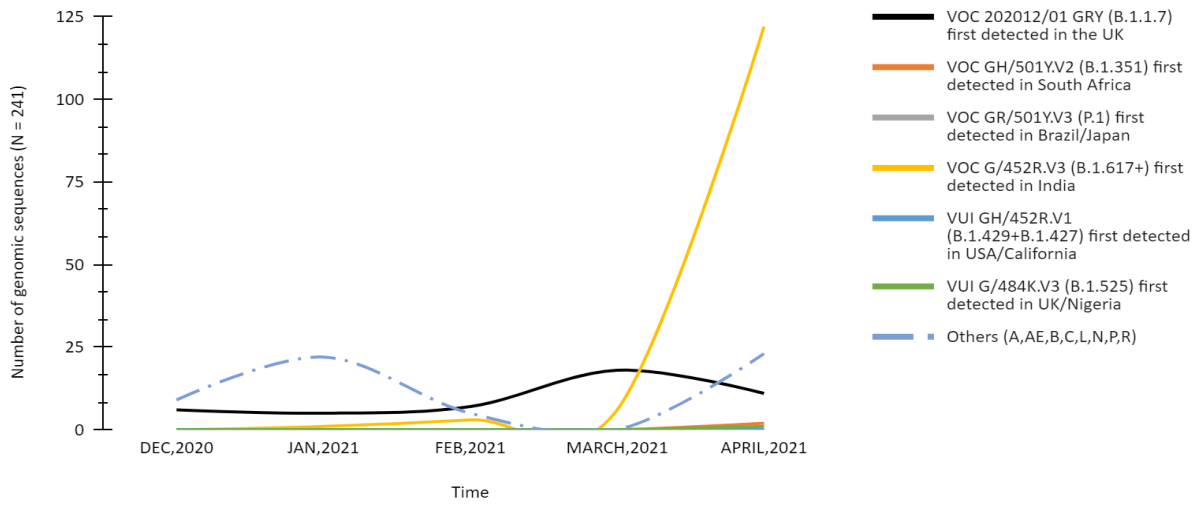

### TELANGANA

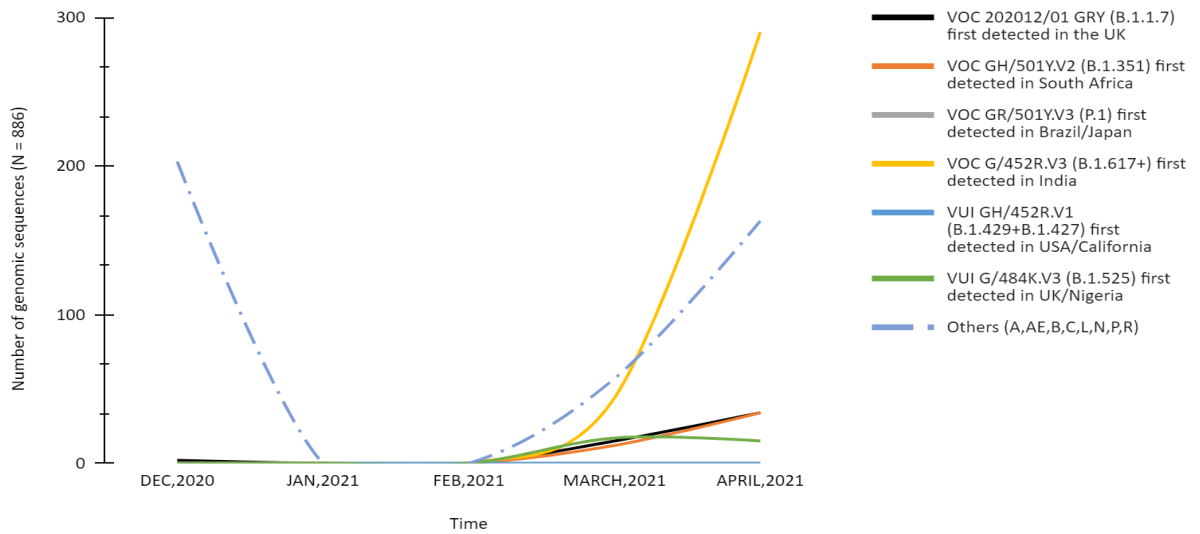

### TRIPURA

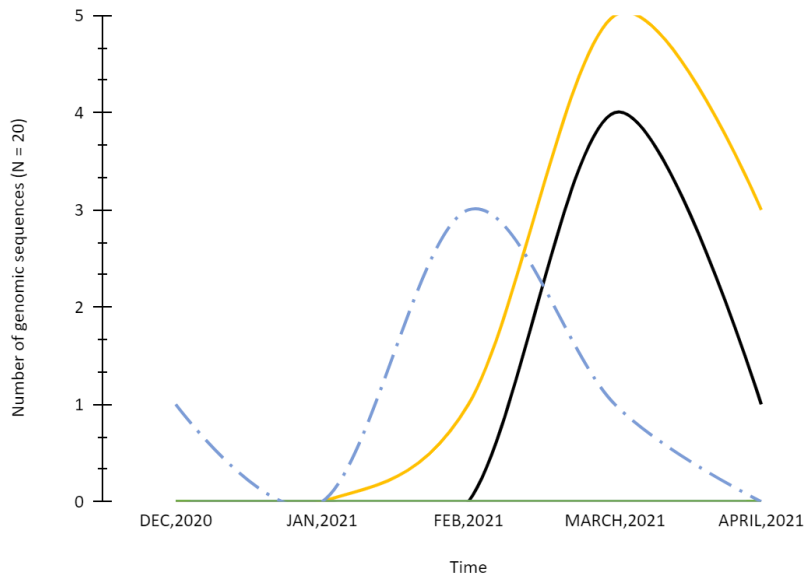

- VOC 202012/01 GRY (B.1.1.7) first detected in the UK
- VOC GH/501Y.V2 (B.1.351) first detected in South Africa
- VOC GR/501Y.V3 (P.1) first detected in Brazil/Japan
- VOC G/452R.V3 (B.1.617+) first detected in India
- VUI GH/452R.V1 (B.1.429+B.1.427) first detected in USA/California
- VUI G/484K.V3 (B.1.525) first detected in UK/Nigeria
- Others (A,AE,B,C,L,N,P,R)

### UTTAR PRADESH

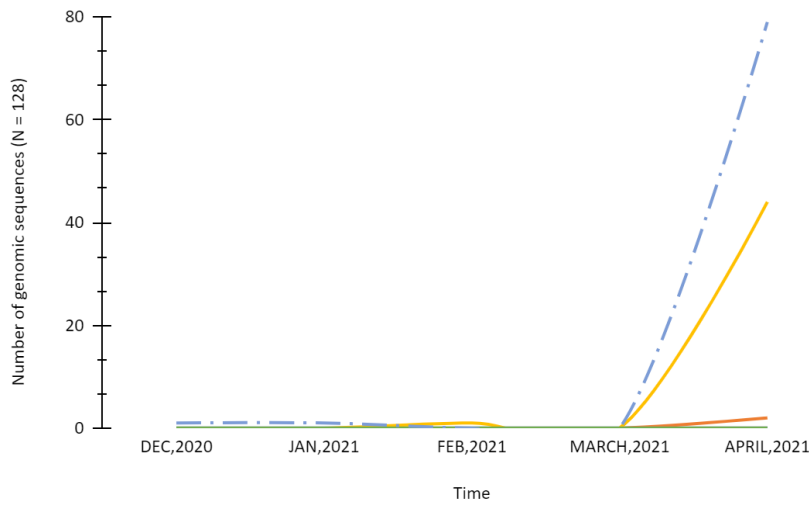

- VOC 202012/01 GRY (B.1.1.7) first detected in the UK
- VOC GH/501Y.V2 (B.1.351) first detected in South Africa
- VOC GR/501Y.V3 (P.1) first detected in Brazil/Japan
- VOC G/452R.V3 (B.1.617+) first detected in India
- VUI GH/452R.V1 (B.1.429+B.1.427) first detected in USA/California
- VUI G/484K.V3 (B.1.525) first detected in UK/Nigeria
- Others (A,AE,B,C,L,N,P,R)

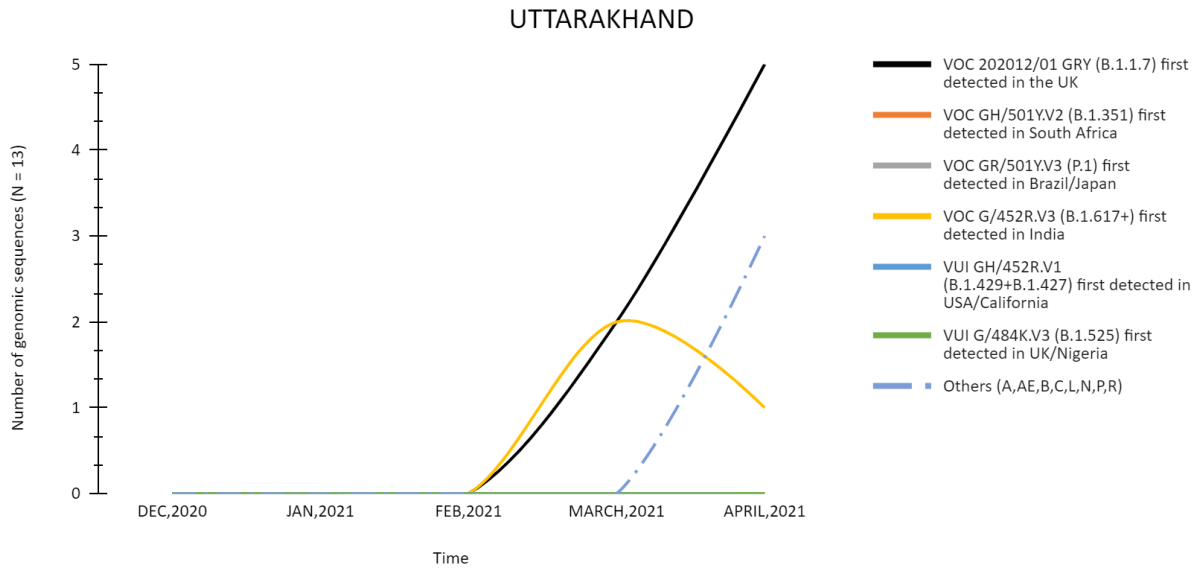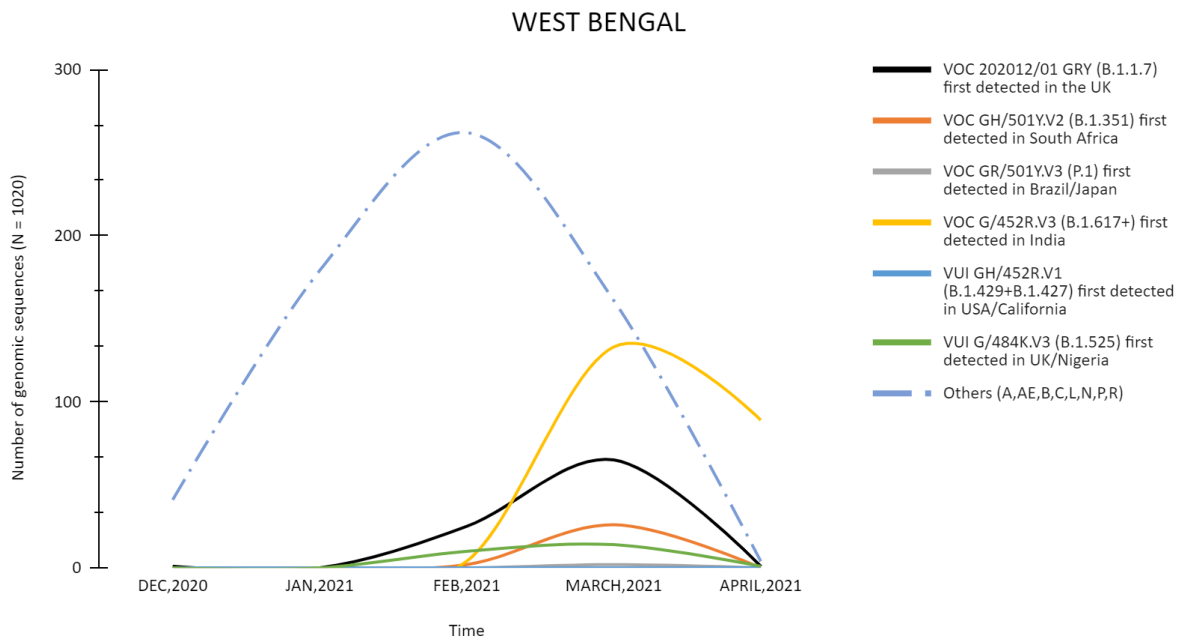

**Figure S2 Monthly distribution of SARS-CoV-2 variants in genomic sequence data from states and union territories of India uploaded on GISAID database for the period of 1<sup>st</sup> December, 2020 to 30<sup>th</sup> April, 2021. Data source: SARS-CoV-2 genomic sequence—GISAID database: <https://www.gisaid.org>.**
